# Supplementary material for: Reciprocal inhibition between TP63 and STAT1 regulates anti-tumor immune response through interferon-γ signaling in squamous cancer
Source: PubMed Central journal article supplement (PMC10954759; doi:10.1038/s41467-024-46785-9), 2024-03-20
Supplement: 41467_2024_46785_MOESM1_ESM.pdf [file 41467_2024_46785_MOESM1_ESM.pdf]

# Supplementary figures

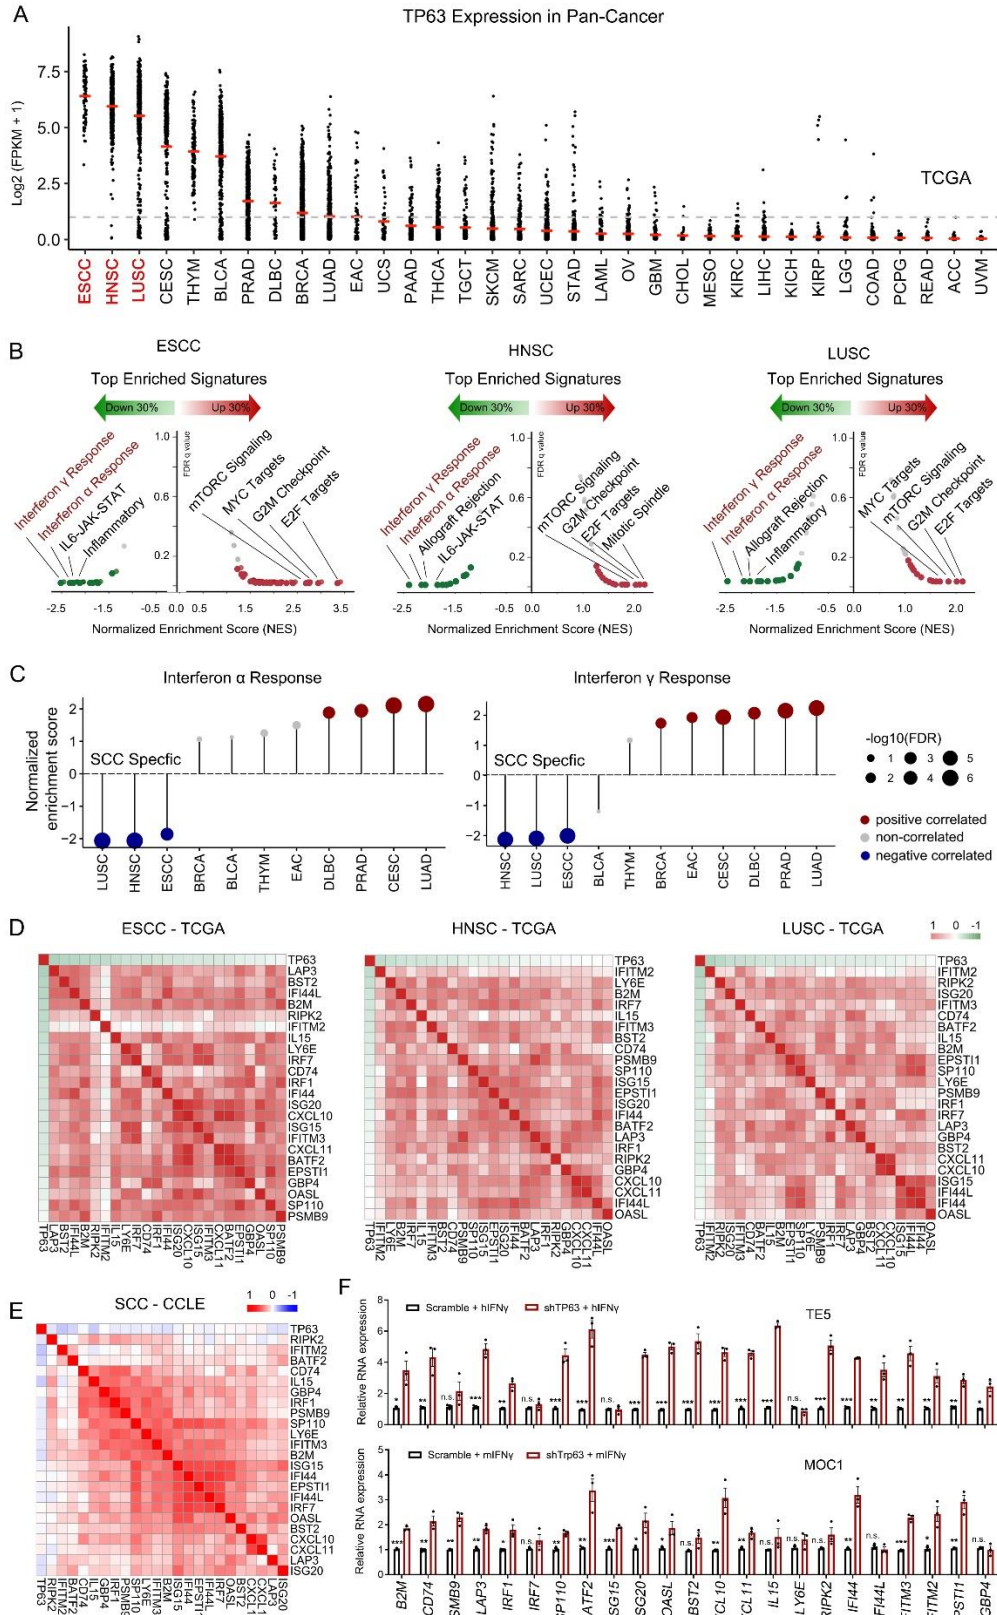

**Supplementary Fig. 1. TP63 suppresses IFN $\gamma$  response signaling and ISGs expression in SCCs, Related to Fig. 1.** (A) The expression of *TP63* in pan-cancer primary tumors (TCGA), presented with  $\log_2^{(\text{FPKM}+1)}$ . Indications ranked by median *TP63* expression are denoted by red bars. (B) The top four enriched signatures that are negatively or positively correlated with the expression of *TP63* in three types of SCC tumors revealed by RNA-seq data and pathway enrichment analysis. RNA-seq data were from TCGA. (C) Cancer types that show negative or positive correlation between IFN $\gamma$ /IFN $\alpha$  response and the expression of *TP63*. Cancer type with *TP63* average FPKM expression  $\geq 1$  in TCGA project was chosen for Hallmark pathway enrichment analysis. (D and E) Pearson correlation matrix for 23 IFN $\gamma$ / $\alpha$  response genes (ISGs) based on TCGA (D) and CCLE datasets (E). (B-D) n= 76 (ESCC), 500 (HNSC) and 501 (LUSC) independent patient samples, respectively. (F) qRT-PCR analysis showing relative mRNA levels of the 23 ISGs in TE5 and MOC1 cells expressing Scramble or sh*Trp63* pulsed with IFN $\gamma$  (100 ng/mL) for 48 hours. Data represent mean  $\pm$  SD, n=3 biologically independent experiments. The significance was determined by two-sided *t*-test. N.S., not significant \*P < 0.05, \*\*P < 0.01, \*\*\* P < 0.001. Source data and exact P values for 1F panel are provided as a Source Data file.

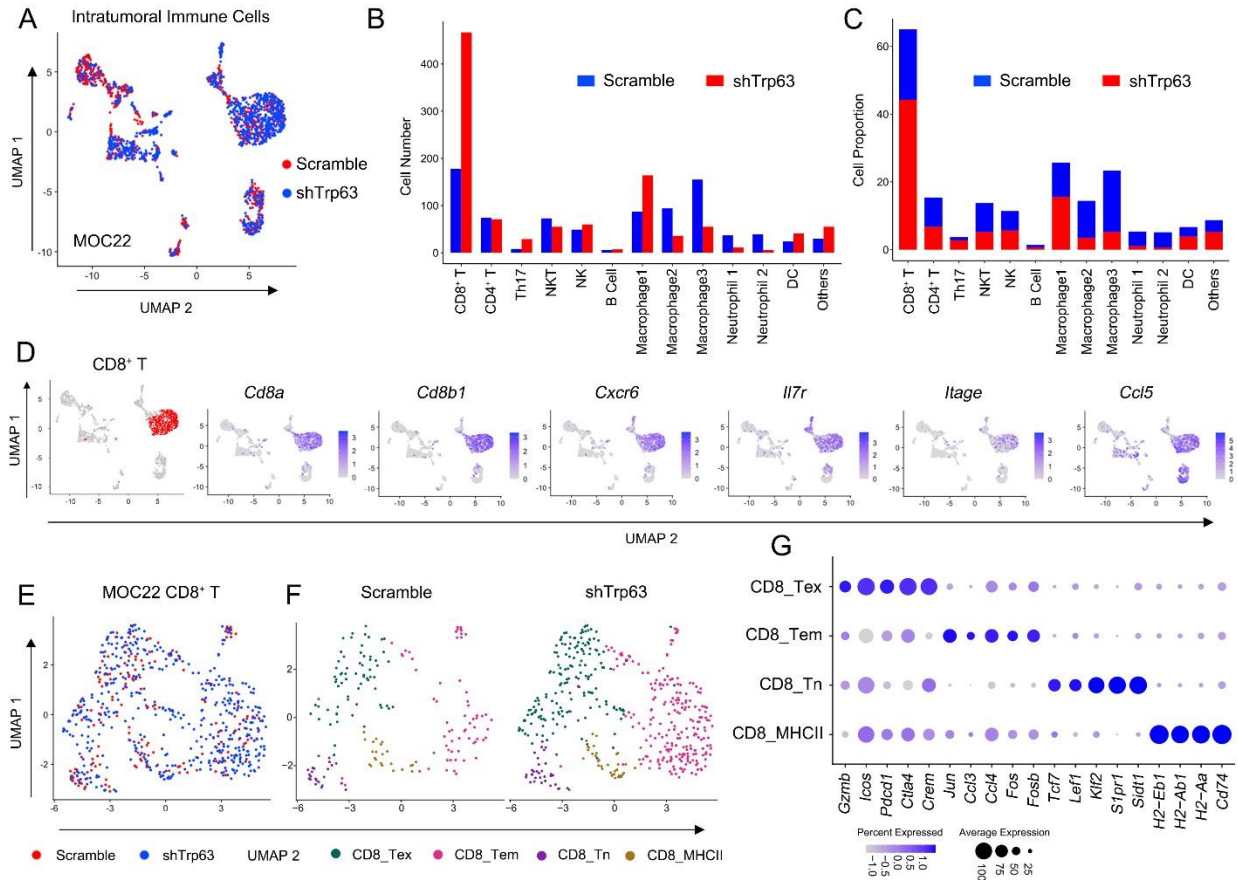

**Supplementary Fig. 2. Downregulation of *TP63* promotes CD8<sup>+</sup> T cell infiltration and activation in murine SCC models, Related to Fig. 2.** (A) UMAP plots displaying all the intratumoral immune cells in either Scramble (red) or *shTrp63* (blue) MOC22 tumors.  $n = 1,911$  cells. No significant batch effect was observed in different conditions of MOC22 tumors. (B and C) Bar plots showing the cell number (B) and cell proportion (C) of each group in Scramble and *shTrp63* MOC22 tumors. 854 and 1,057 cells were analyzed in either Scramble and *shTrp63* group. (D) UMAP plots showing the expression levels of representative marker genes in CD8<sup>+</sup> T cells.  $n = 1,911$  cells. (E and F) UMAP visualization of 645 CD8<sup>+</sup> T cells from Scramble and *shTrp63* tumors, colored by different conditions (E), or cell types in each condition (F). 178 cells in Scramble and 467 cells in *shTrp63* group. (G) Dot plot showing the expression levels of representative marker genes across each CD8<sup>+</sup> T cell subgroup.  $n = 238$  in CD8\_Tex, 289 in CD8\_Tem, 57 in CD8\_Tn and 61 in CD8\_MHCII subgroups.

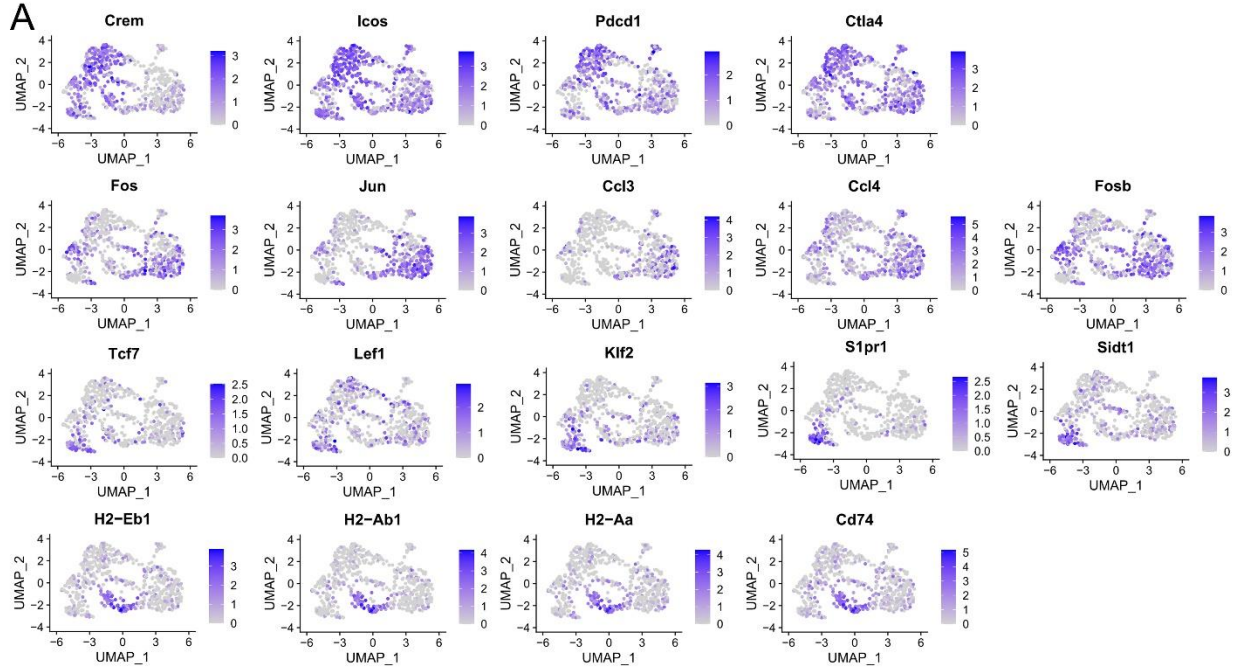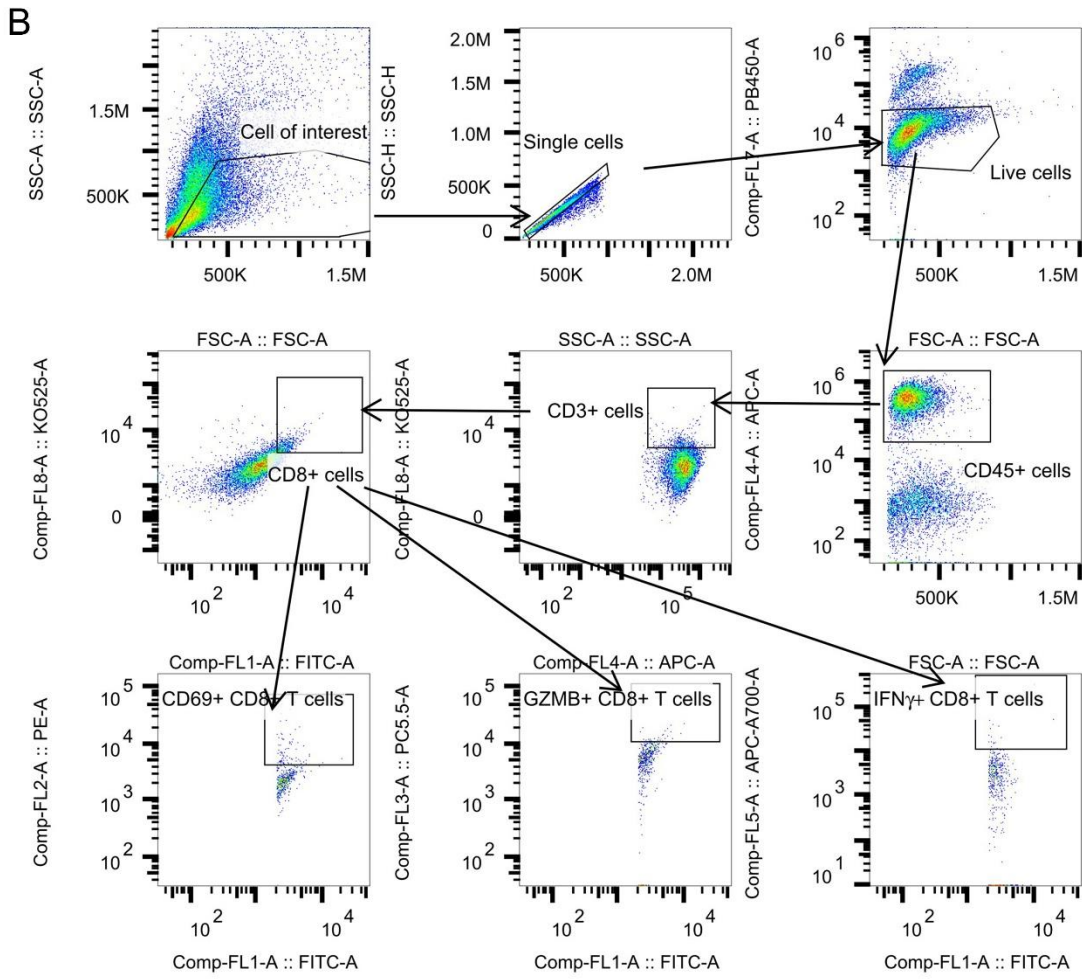

**Supplementary Fig. 3. Expression of TP63 changes CD8<sup>+</sup> T cell infiltration and activation of murine SCC tumors, Related to Fig. 2.** (A) UMAP visualization of CD8<sup>+</sup> T cells with color-coded for the expression levels of representative mark genes. (B) The gating strategy and a representative staining example for immune profiling of murine SCC tumors. AKR and HNM007-allograft tumors were collected after 7 days induction of Doxycycline. Tumors were dissociated into single cell suspension; immune cells were enriched using CD45 MicroBeads. Single cells were first gated and followed by Fixable Viability Stain 450 selection for live cells. Immune cell populations were then identified by the sequential gating strategy using specific markers: total immune cells (CD45<sup>+</sup>), total T cells (CD3<sup>+</sup>), CD8<sup>+</sup> T cells. In addition, the expression of activation and cytotoxic protein markers (CD69, GZMB, IFN $\gamma$ ) in CD8<sup>+</sup> T cells was analyzed.

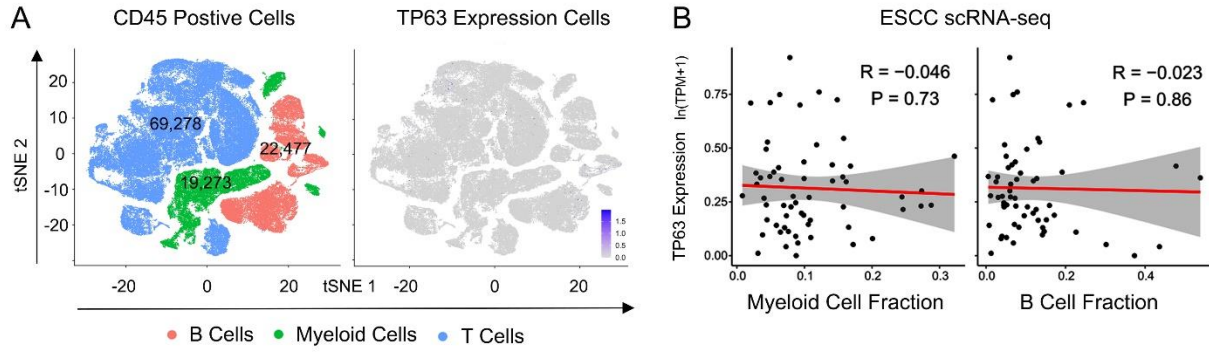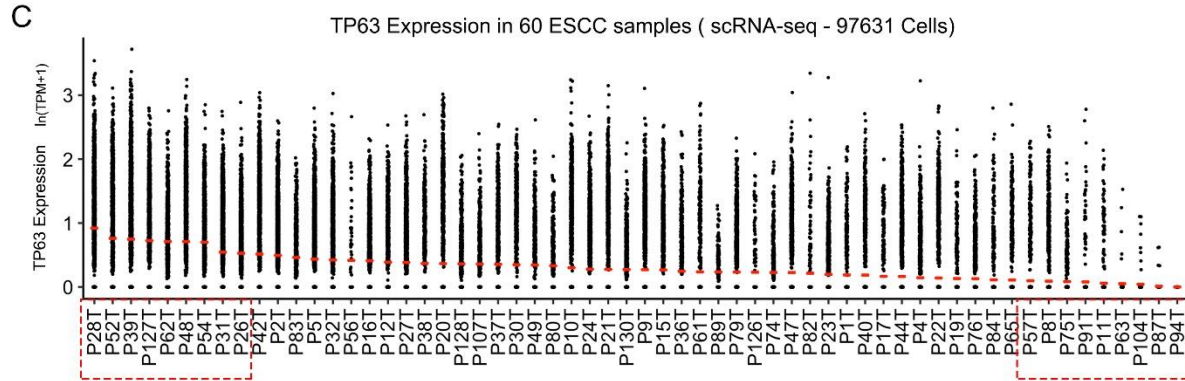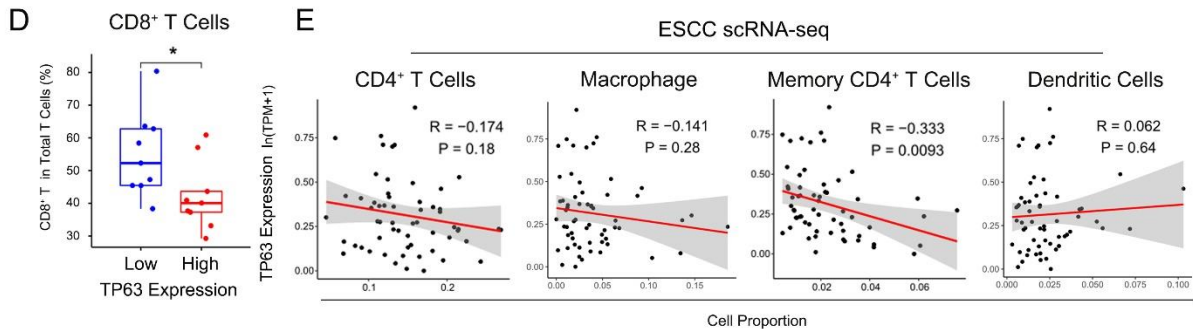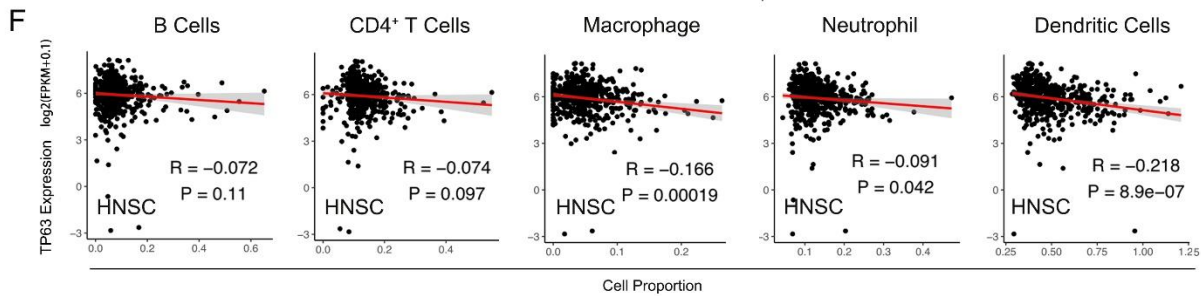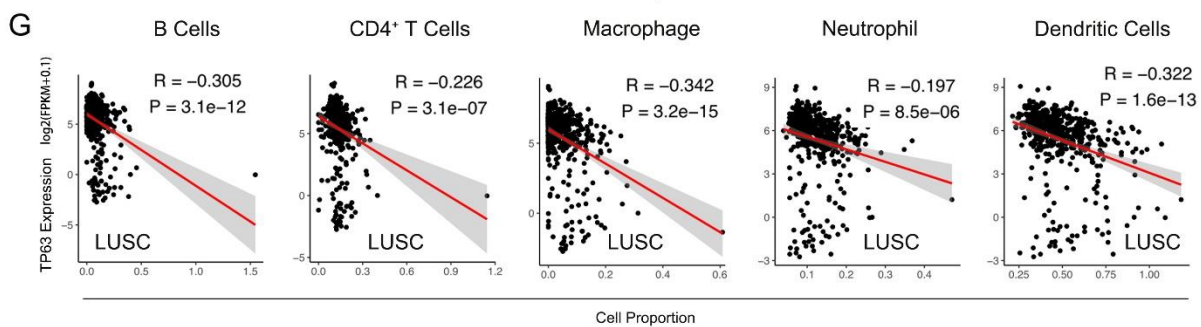

**Supplementary Fig. 4. Negative correlation between CD8<sup>+</sup> T cell infiltration and tumor-intrinsic TP63 expression in the TME of human ESCC, Related to Figs. 3 and 4.** (A) t-SNE plots of 111,028 CD45<sup>+</sup> cells in 60 ESCC patient tumors and 4 adjacent normal tissue samples, colored by cell types (left) and *TP63* expression (right). The median expression of *TP63* in CD45<sup>+</sup>/CD45<sup>-</sup> cells in each ESCC patients was calculated. (B) Myeloid or B cell fractions showing no correlation with *TP63* expression. (C) Beeswarm plot showing *TP63* expression in each CD45<sup>-</sup> cell of each sample. Patient samples are ranked by the median expression level of *TP63* highlighted with red bars. The top/bottom 15% patient samples according to *TP63* expression are labeled with red dotted-line rectangle. *TP63*-low samples, n=9. *TP63*-high samples, n=9. (D) Box plots showing the cell proportion of CD8<sup>+</sup> T cells in total T cells of *TP63*-low/high expressing samples. The boxplot shows the median (central line), upper and lower quartiles (box limits), and min to max range (whiskers) analyzed by a two-sided *t*-test. P = 0.0361 (\*). (E) Scatter plots revealing the correlation between different immune cell populations and the expression of *TP63* in ESCC patient tumors. scRNA-seq data of (A-C) were retrieved from GSE160269<sup>1</sup>. n = 60. (F and G) The correlation between different immune cell fractions and *TP63* expression in 500 HNSC (F) and 501 LUSC (G) patient samples. The immune cell fractions were predicted by TIMER2<sup>2</sup> using TCGA expression datasets. Pearson Correlation Coefficient was calculated in (B and E-G). The error bands show 95% confidence interval. R: Pearson's product-moment correlation; P value: Two-sided *t*-test.

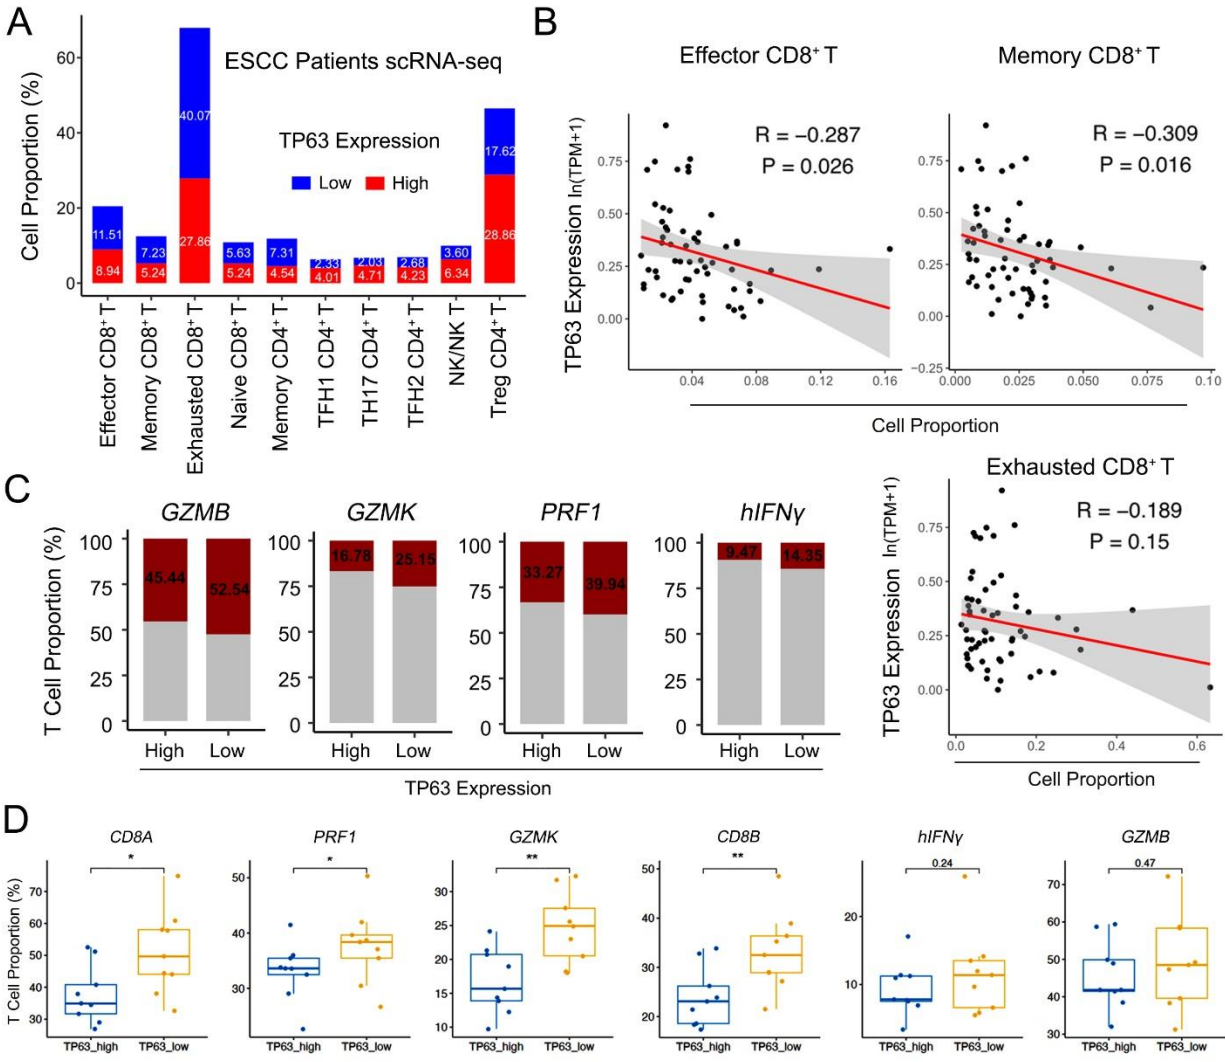

**Supplementary Fig. 5. Over-expression of TP63 impairs CD8<sup>+</sup> T cell infiltration and activation, Related to Fig. 4.** (A) Cell proportion of T cell subgroups in *TP63*-high/low expressing ESCC patient samples. n = 8,182 (effector CD8 T), 4,495 (Memory CD8 T), 21,893 (Exhausted CD8 T), 3,544 (Naïve CD8 T), 4,301 (Memory CD4 T), 2,578 (Tfh1 CD4 T), 2,504 (Th17 CD4 T), 1,811 (Tfh2 CD4 T), 3,839 (NK/NKT) and 16,131 (Treg CD4 T) cells in total. (B) The correlation between the abundance of effector/memory/exhausted CD8<sup>+</sup> T cells and the expression of *TP63* in ESCC patient tumors. n = 60. Pearson Correlation Coefficient was calculated. The error bands show 95% confidence interval. R: Pearson's product-moment correlation; P value: Two-sided t-test. (C) Bar plots showing the proportion of cytotoxic lymphocytes that express cytotoxic and activation markers including GZMB, GZMK, PRF1 and IFN $\gamma$  in *TP63*-high/low expressing ESCC tumors. A total of 9,001 and 11,012 cells were analyzed in *TP63* high and *TP63* low group,



respectively. **(D)** Box plots showing the statistical analysis of **(C)** according to the cell proportion of T cells with the expression of indicated marker genes in *TP63*-low/high expressing patient tumor samples. n = 9 in each group. For each gene of interest, we defined target gene-positive cells if the corresponding TPM  $\geq 1$ . Subsequently, we calculated the fraction of target gene-positive T cells in *TP63*-low and *TP63*-high tumors. The boxplot shows the median (central line), upper and lower quartiles (box limits), and min to max range (whiskers). One-tailed Wilcoxon test was used to compare these two groups. P value in each group: 0.012 (*CD8A*), 0.047 (*PRF1*), 0.0053 (*GZMK*), 0.0071 (*CD8B*), 0.24 (*IFNG*), 0.47 (*GZMB*). \*P < 0.05, \*\*P < 0.01.

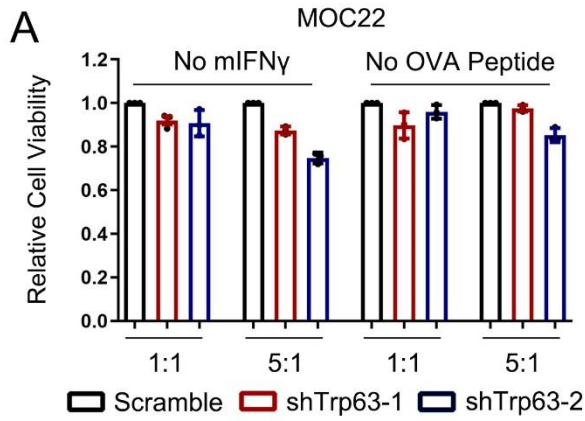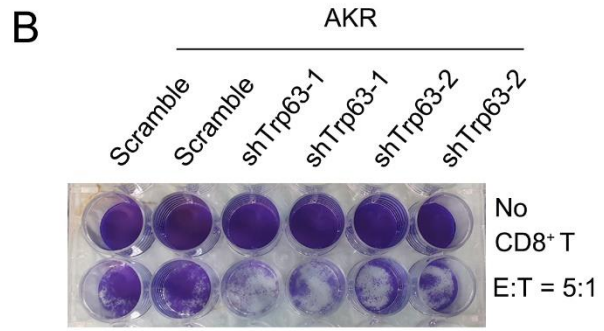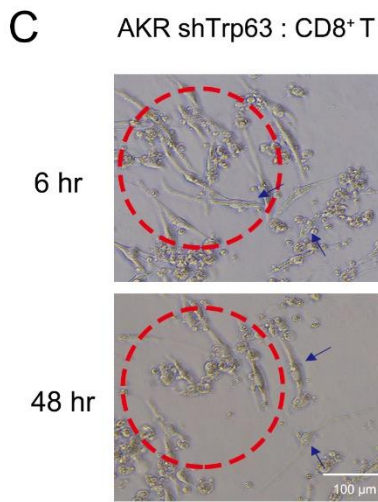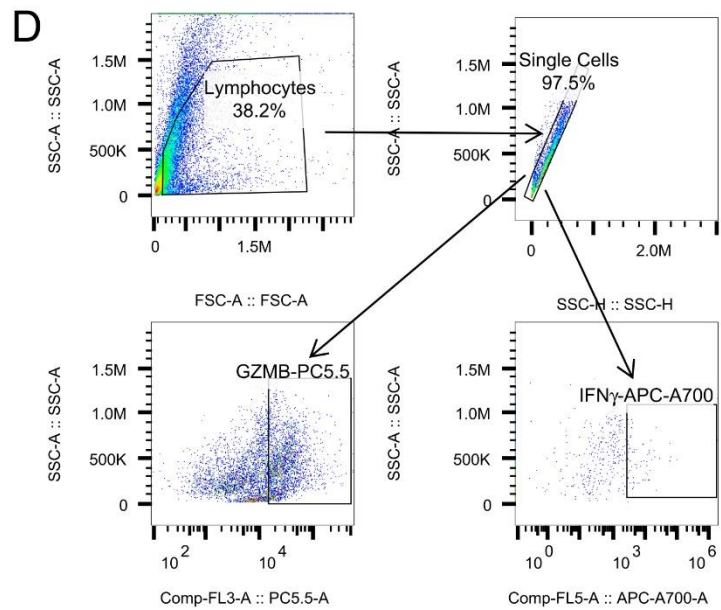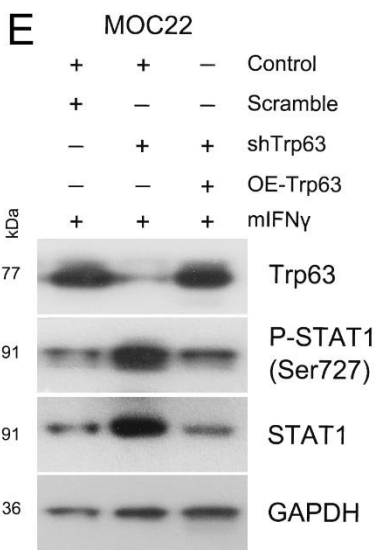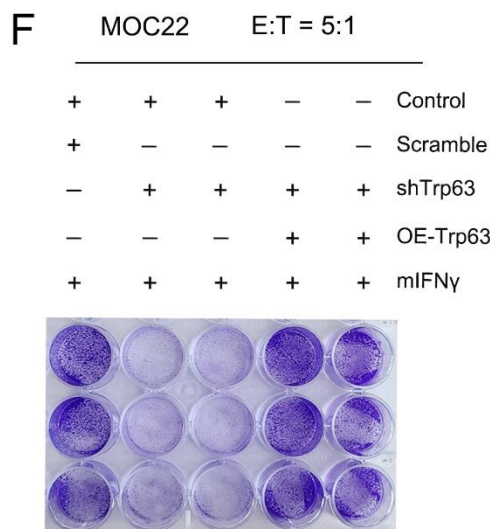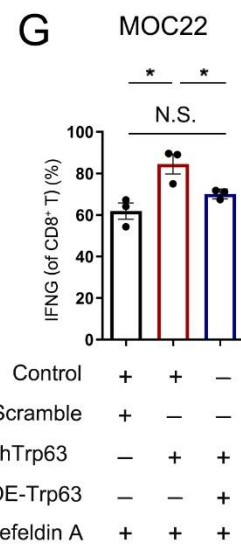

**Supplementary Fig. 6. TP63 suppresses IFN $\gamma$ /STAT1 signaling and CD8<sup>+</sup> T-cell killing, Related to Fig. 5.** (A) Relative cell viability of Scramble and sh*Trp63* MOC22 cells pulsed with or without IFN $\gamma$ /OVA peptide in co-culture with OT-I CD8<sup>+</sup> T cells at indicated effector: target (E: T) ratios. The results were repeated in three biologically independent experiments. (B) Crystal violet staining of Scramble and sh*Trp63* AKR cells incubation with or without OT-I CD8<sup>+</sup> T cells at the indicated effector: target (E: T) ratios. (C) Bright field images showing representative sh*Trp63* AKR cells that were killed by activated OT-I CD8<sup>+</sup>T cells following 48 hr co-culture. Red circles highlight lost AKR cells; Blue arrows indicate the location of cells. Murine Scramble/sh*Trp63* SCC cells were pretreated with IFN $\gamma$  (10 ng/mL) for 24 hr before pulsing with OVA peptide in (B) and (C). (D) The exemplification of the gating strategy for intracellular cytokine stains in *ex vivo* co-culturing system (related to Figures 5E and 5F). After 48 hr of co-culturing SCC and CD8 T cells, adherent living cancer cells were stained crystal violet, while suspended CD8 T cells were collected for flow cytometry analysis of GZMB and IFN $\gamma$ . Single cells were first gated. The expression of activation and cytotoxic protein markers (GZMB, IFN $\gamma$ ) in the co-culturing system was analyzed. The results of (B-D) were repeated with three biologically independent experiments in two cell lines. (E) Western blotting analysis showing the protein levels of TP63, p-STAT1 and STAT1 in the indicated conditions in MOC22 cells. MOC22 cells were transfected with siRNA targeting *Trp63* or non-targetable control (Scramble) and ectopically expressed TP63 or empty vector (Control) in the presence of IFN $\gamma$  (100 ng/mL). *Trp63*-KD: *Trp63* knockdown; OE-*Trp63*: ectopic expression of *Trp63*. (F) Crystal violet staining of MOC22 cells pretreated with IFN $\gamma$  (10 ng/mL) and incubation with OT-I CD8<sup>+</sup> T cells for 24 hr at 5:1 effector: target (E: T) ratio. The results of (E and F) were repeated in two biologically independent experiments. (G) Percent of IFN $\gamma$ <sup>+</sup> production in Scramble, sh*Trp63* and TP63-overexpressing MOC22 and OT-I T cell co-cultures. Brefeldin A was added for the last 4 hr before harvest of cells. Data represent mean  $\pm$  SD, n=3 biologically independent experiments. The significance was determined by two-sided *t*-test. P value: 0.0213 (*Trp63*-KD vs. Scramble), 0.0442 (*Trp63*-KD vs. *Trp63*-KD + OE-*Trp63*), 0.1160 (Scramble vs. *Trp63*-KD + OE-*Trp63*) \*P < 0.05; N.S., not significant. Source data are provided as a Source Data file.

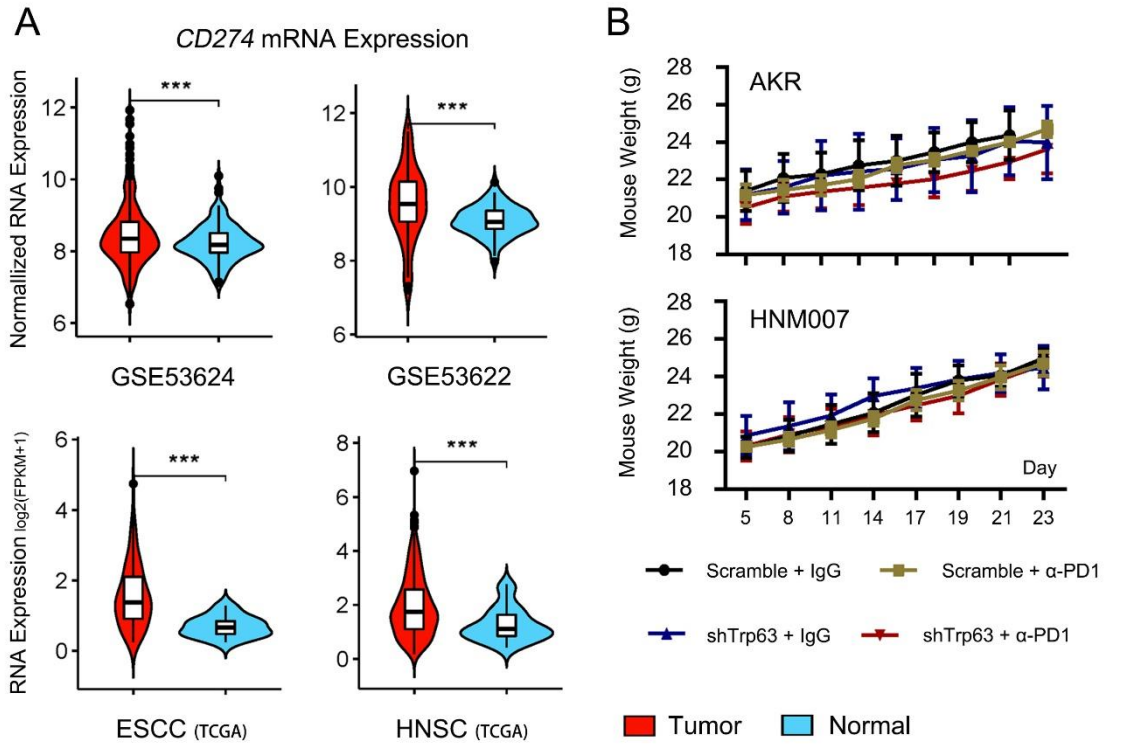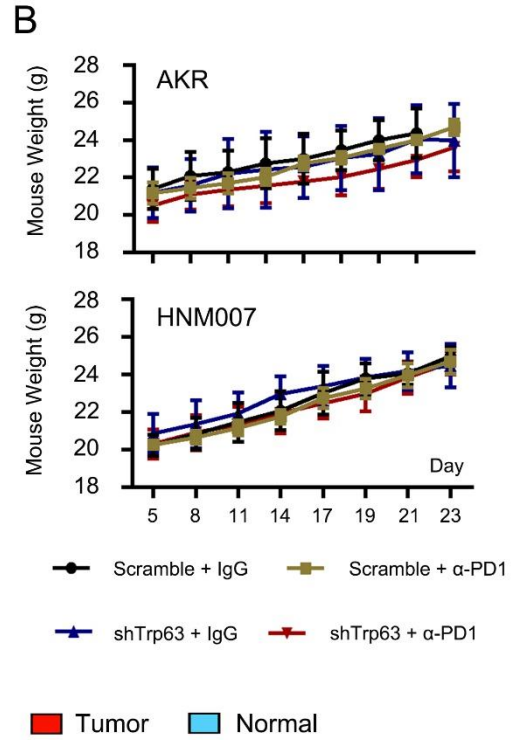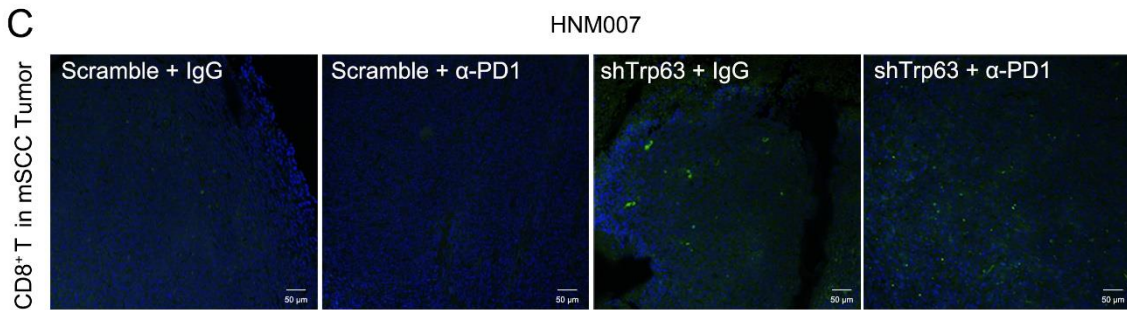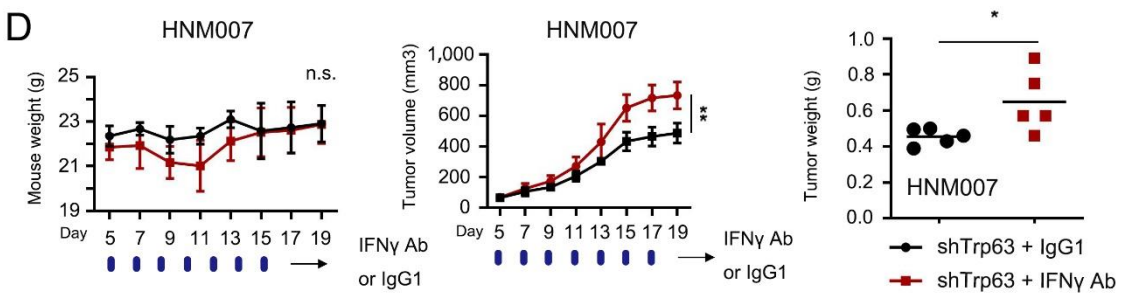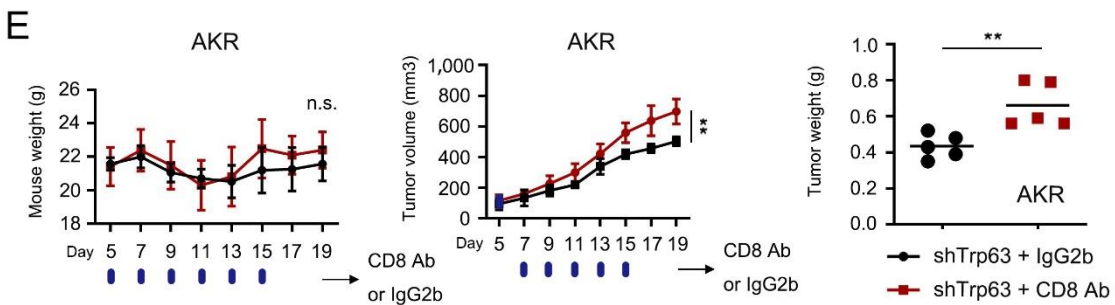

**Supplementary Fig. 7. Tumor reduction in the syngeneic mouse tumor model by downregulation of *Trp63* is CD8<sup>+</sup> T cell-dependent, Related to Fig. 5.** (A) Relative mRNA levels of *CD274* (PD-L1) in different cohorts of SCC samples. Data were retrieved from GSE53624, GSE53622 and TCGA database. Statistical significance were calculated using a two-tailed *t* test. n and P values in each group: 119 T (tumor) vs. 119 N (normal)/1.8E-04 (GSE53624), 60 T vs. 60 N/3.8E-04 (GSE53622), 76 T vs. 9 N/4.6E-04 (ESCC from TCGA), 500 T vs. 44 N/4.9E-05 (HNSC from TCGA). \*\*\*P < 0.001. (B) Body weight curve of SCC tumor-bearing mice received PD-1 mAb treatment or IgG isotype control (IgG2a). n=5 for each group. (C) Representative IF staining results showing the CD8<sup>+</sup> T cells abundance in Scramble and *shTrp63* HNM007 allografts, tumor-bearing mice treated with either PD-1 mAb or IgG isotype control (Scale bar, 50  $\mu$ m). The similar results were observed in three biologically independent samples. (D) Body weights, tumor growth curves and tumor weights at completion of the study of *shTrp63* HNM007-bearing mice treated with IFN $\gamma$  blocking antibody (n=5) or IgG isotype control (IgG1) (n=5). mAbs were given by intraperitoneal injection (i.p., 400  $\mu$ g/injection/mouse) once every 2 days for up to 2 weeks. The significance was determined by a one-sided *t* -test. For the comparison between *shTrp63* + IgG1 and *shTrp63* + IFN $\gamma$  Ab group: P = 0.9416 for mouse weight, P = 0.001 for tumor volume and P = 0.0405 for tumor weight. (E) Body weights, tumor growth curves and tumor weights at completion of the study of *shTrp63* AKR-bearing mice treated with CD8 mAb (CD8 T-cell-depletion antibody) (n=5) or IgG isotype control (IgG2b) (n=5). mAbs were given by intraperitoneal injection (i.p., 100  $\mu$ g/injection/mouse) once every 2 days for up to 2 weeks. The significance was determined by a one-sided *t* -test. For the comparison between *shTrp63* + IgG1 and *shTrp63* + IFN $\gamma$  Ab group: P = 0.2441 for mouse weight, P = 0.001 for tumor volume and P = 0.0072 for tumor weight. N.S., not significant; \*P < 0.05, \*\*p < 0.01.

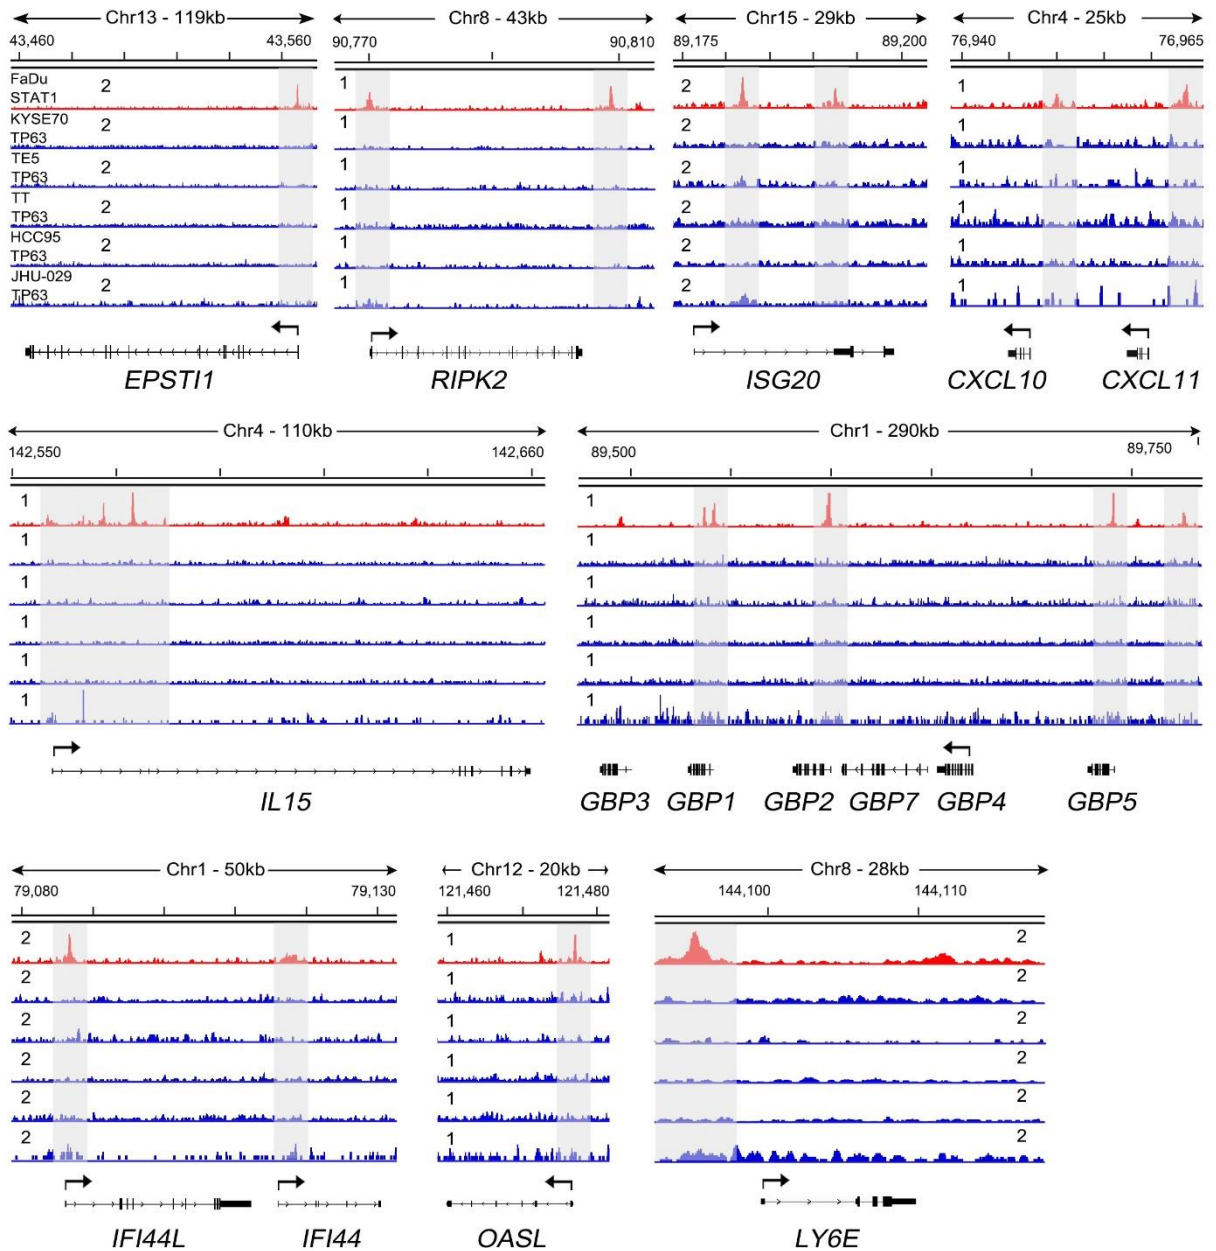

**Supplementary Fig. 8. Occupancy of STAT1 but not TP63 at ISGs, Related to Fig. 6.** IGV tracks of ChIP-seq revealing binding peaks for STAT1 (red) and TP63 (blue) on the promoter or enhancer loci of indicated IFN response genes. Grey shadows highlighting promoter region of each gene.

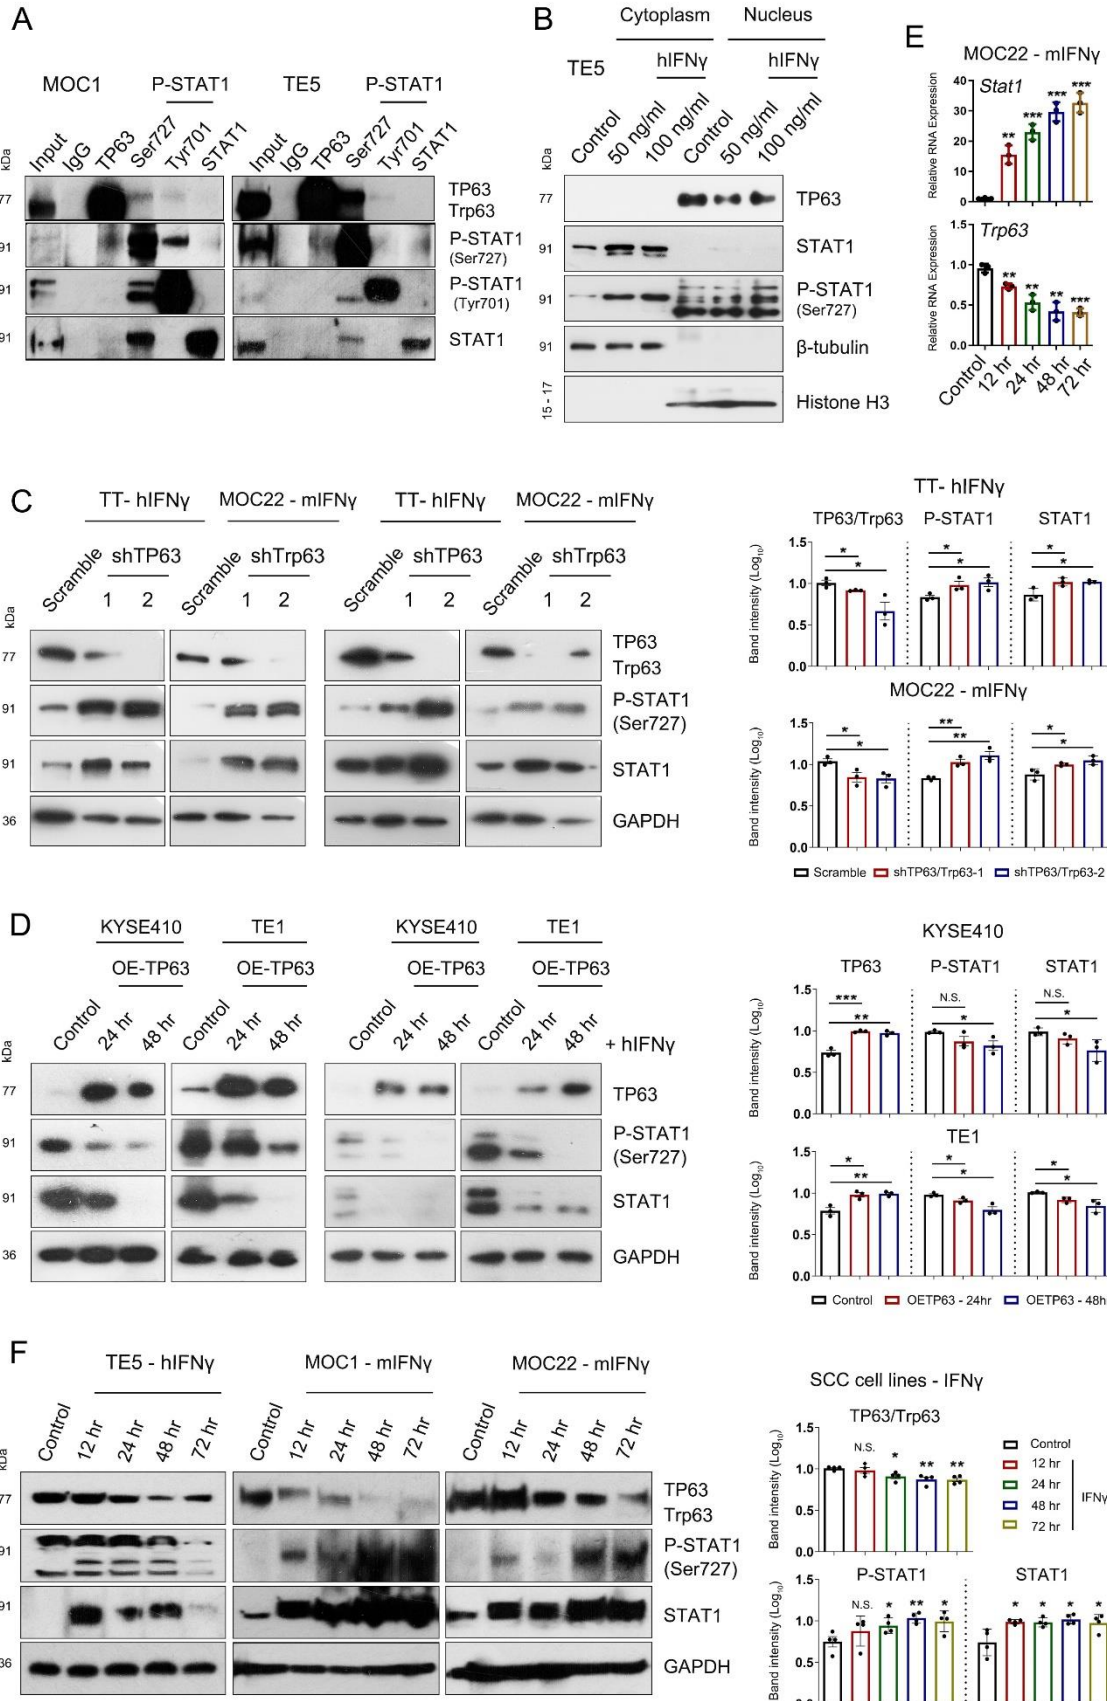

**Supplementary Fig. 9. Reciprocal inhibition between TP63 and IFN $\gamma$ -STAT1 signaling, Related to Fig. 6.** (A) Co-IP followed Western blotting analysis showing the protein interaction between TP63 and phosphorylated STAT1 (Ser727 and Tyr701) in both murine MOC1 and human TE5 cells. (B) Western blotting analysis revealing the subcellular localization of TP63 and p-STAT1 (Ser727) at cytoplasm and nucleus of TE5 cells stimulated with IFN $\gamma$  at different concentrations. The results were repeated in two biologically independent experiments. (C-F) Independent biological or/and experimental replicates (related to Figures 6F, 6G and 6I) of western blotting analysis (left) and statistical densitometry analyses (right) of left panel showing levels of TP63, STAT1 and p-STAT1 in the indicated cells and conditions, including knockdown *TP63* (C), overexpression of *TP63* (D) and a time-dependent change of mRNA (E) and protein levels (F). IFN $\gamma$  (100 ng/mL) was administrated for 48 hr in (C). *TP63*-KD: *TP63* knockdown; *OE-Trp63*: ectopic over-expression of *TP63*. The results of panel (A and F) were repeated in four biologically independent cell lines. The results of (C-E) were repeated with three biologically independent experiments in two cell lines. Bars of (C-F) represent mean  $\pm$  SD. The significance was determined by two-sided *t*-test. P value for the comparison of TP63, p-STAT1 and STAT1 protein level between Scramble and sh*TP63*-1/-2 in (C): 0.0437/0.0363, 0.0491/0.0367, 0.0419/0.0261 in TT cells; 0.0384/0.0258, 0.0059/0.0049, 0.0445/0.0284 in MOC22 cells. P value for the comparison of TP63, p-STAT1 and STAT1 protein level between Control and OE-TP63-24hr/-48 in (D): 9.82E-04/0.0025, 0.1260/0.0483, 0.1740/0.0468 in KYSE410 cells; 0.0148/0.0076, 0.0434/0.0111, 0.0105/0.0235 in TE1 cells. P value for the comparison of *STAT1* and *TP63* mRNA level between Control and IFN $\gamma$  treatment for 12 hr/24 hr/48 hr/72 hr in (E): 0.0012/1.24E-04/9.60E-05/8.07E-05 for *STAT1*; 0.0038/0.0028/0.0018/1.91E-04 for *Trp63*. P value for the comparison of TP63, p-STAT1 and STAT1 protein level between Control and IFN $\gamma$  treatment for 12 hr/24 hr/48 hr/72 hr in (F): 0.5180/0.0123/0.0052/0.0018 for TP63; 0.2851/0.0465/0.0064/0.0315 for p-STAT1; 0.0230/0.0300/0.0175/0.0489 for STAT1. N.S., not significant; \*P < 0.05, \*\*P < 0.01, \*\*\*P < 0.001. Source data are provided as a Source Data file.



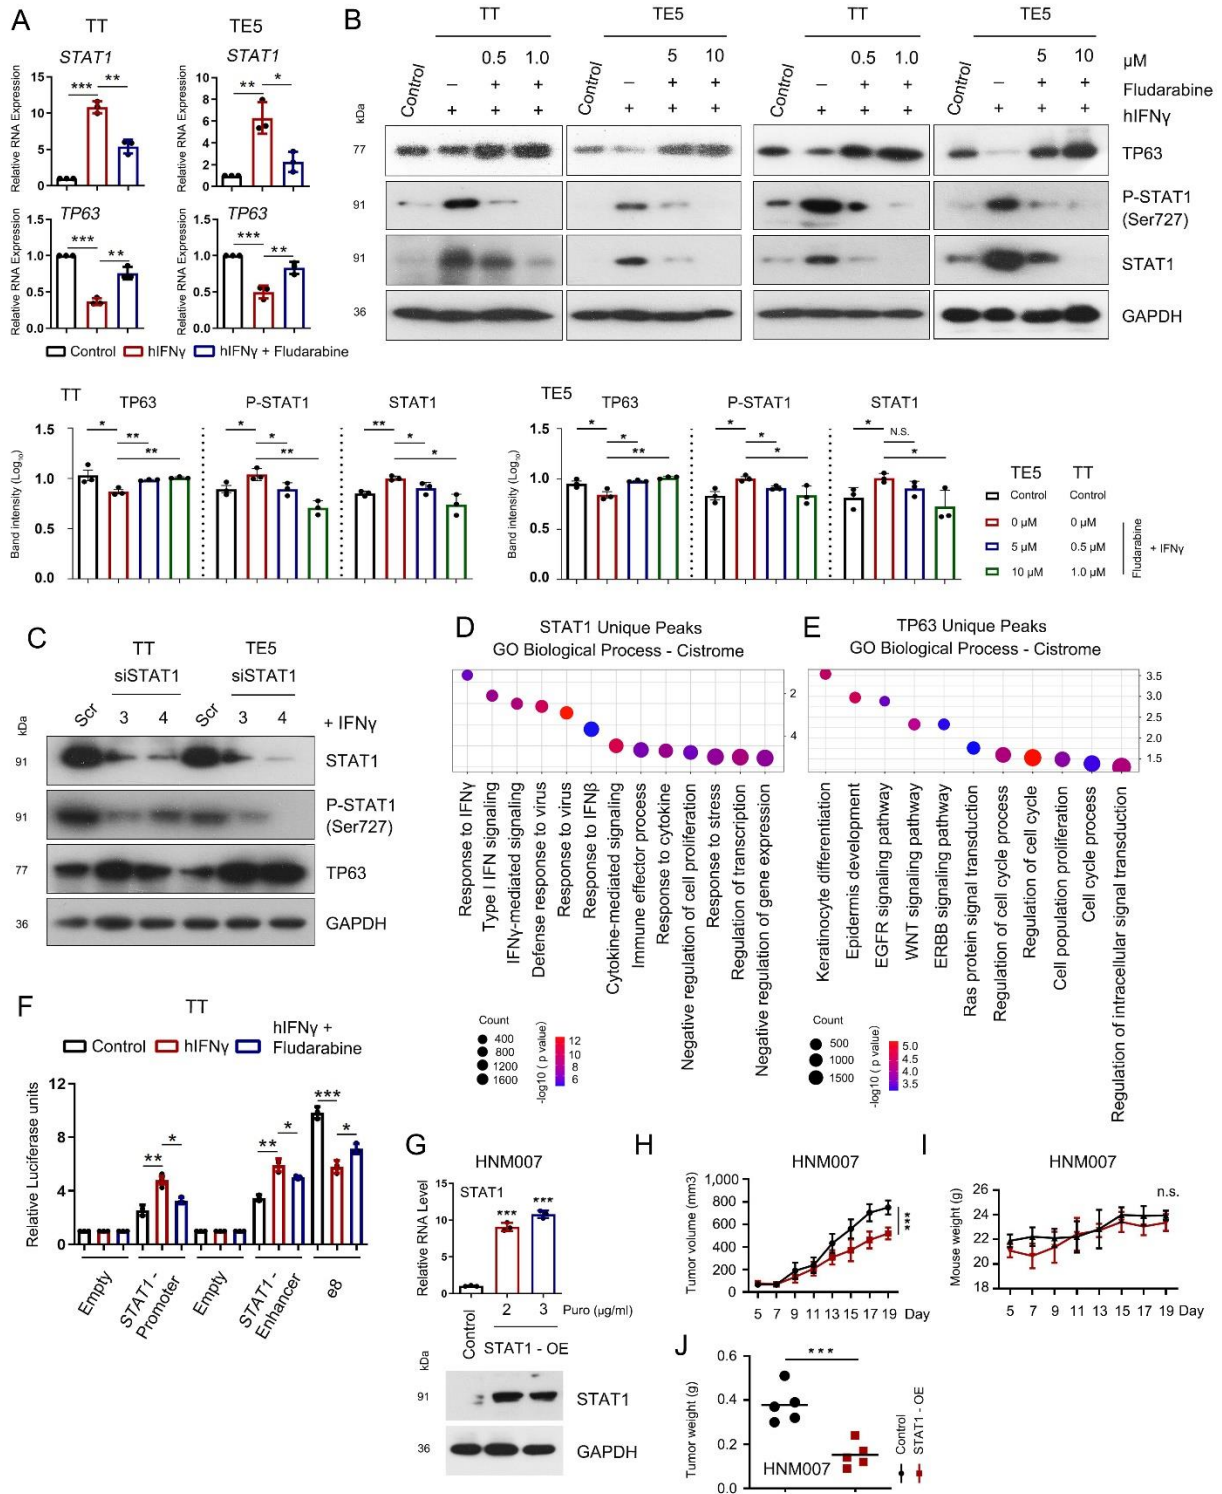

**Supplementary Fig. 10. Reciprocal transcriptional inhibition between TP63 and STAT1, Related to Fig. 7.** (A) qRT-PCR analysis revealing mRNA expression of *STAT1* and *TP63* in

both TT and TE5 cells treated with IFN $\gamma$  (100 ng/mL) +/- Fludarabine (1  $\mu$ M and 10  $\mu$ M for TT and TE5 respectively), a STAT1-specific inhibitor. P value for the comparison of Control vs. IFN $\gamma$  and IFN $\gamma$  vs. IFN $\gamma$  + Fludarabine group: 3.04E-05/0.0016 for *STAT1*, 2.14E-05/0.0023 for *TP63* in TT cells; 0.0032/0.0154 for *STAT1*, 0.0006/0.0088 for *TP63* in TE5 cells. **(B)** Two independent experimental replicates (related to Figure 6J) of western blotting analysis (upper) and statistical densitometry analyses (lower) of upper panel showing levels of TP63, STAT1 and p-STAT1 in both TT and TE5 cells treated with IFN $\gamma$  (100 ng/mL) or/and Fludarabine, a STAT1-specific inhibitor. P value for the comparison of Control vs. IFN $\gamma$  treatment, IFN $\gamma$  vs. IFN $\gamma$  + Fludarabine (0.5  $\mu$ M /1  $\mu$ M in TT or 5  $\mu$ M/10  $\mu$ M in TE5): 0.0492/0.0058/0.0033 for TP63, 0.0465/0.0452/0.0034 for p-STAT1, 0.0014/0.05/0.0130 for STAT1 in TT cells; 0.0485/0.0128/0.0060 for TP63, 0.0195/0.0116/0.0396 for p-STAT1, 0.0396/0.107/0.0441 for STAT1 in TE5 cells. **(C)** Western blotting assays showing protein levels of indicated proteins upon knockdown of STAT1 (with #3 and #4 siRNA target) or not. The results were repeated in three biologically independent experiments. **(D and E)** Functional categories of STAT1- (D) or TP63- (E) uniquely occupied regions in SCC cells. **(F)** Relative luciferase activity of pGL3-enhancer (1<sup>st</sup> Empty), pGL3-enhancer+STAT1 promoter, pGL3-promoter (2<sup>nd</sup> Empty), pGL3-promoter+STAT1 enhancer, pGL3-promoter+e8 upon stimulation with IFN $\gamma$  (100 ng/mL) +/- Fludarabine (1  $\mu$ M) in TT cells. Relative luciferase activity comparison of Control vs. IFN $\gamma$ , IFN $\gamma$  vs. IFN $\gamma$  + Fludarabine: P = 0.0041 and P = 0.0101 for *STAT1*-promoter group, P = 0.0013 and P = 0.032 for *STAT1*-enhancer group, P = 0.0004 and P = 0.0201 for e8 group. **(G)** qRT-PCR (upper) and western blotting (lower) analysis showing mRNA and protein levels of STAT1 in STAT1-overexpressing HNM007 cells. Stably *STAT1*-overexpressed cells were selected with puromycin at the concentration either 2  $\mu$ g/mL or 3  $\mu$ g/mL. Puro: puromycin. P value for the comparison of Control vs. Puro (2  $\mu$ g/mL or 3  $\mu$ g/mL) selection group: 1.61E-05/4.94E-06. **(H-J)** Tumor growth curves **(H)**, Body weights **(I)** and Tumor weights at completion of the study **(J)** of HNM007-bearing mice with either STAT1-overexpression (n=5) or empty vector control (n=5). **(A, B, F and G)** Data represent mean  $\pm$  SD, n=3 biologically independent experiments. P values were determined using a two-sided *t*-test. The significance of **(H-J)** was determined by a one-sided *t*-test. P value for each group: 0.0002 **(H)**, 0.1332 **(I)**, 9.97E-04 **(J)**. N.S., not significant; \*P < 0.05, \*\*P < 0.01, \*\*\*P < 0.001. Source data are provided as a Source Data file.

**Supplementary Table 1. Key Resources Used in This Study.**

| <b>REAGENT or RESOURCE</b>                             | <b>SOURCE</b>                            | <b>IDENTIFIER</b>                                                           |
|--------------------------------------------------------|------------------------------------------|-----------------------------------------------------------------------------|
| <b>Antibodies</b>                                      |                                          |                                                                             |
| Rabbit Anti-p63 Antibody                               | Abcam                                    | Cat# ab97865; 1:1000 for WB; 1:200 for IF                                   |
| Rabbit Anti-p63- $\alpha$ Antibody                     | Cell Signaling Technology                | Cat# 13109; clone D2K8X; 1:1000 for WB; 1:500 for IF; 1:100 for IP and ChIP |
| Rabbit Anti-p63 Antibody                               | GeneTex                                  | Cat# GTX102425; clone N2C1; 1:1000 for WB; 1:400 for IF                     |
| Mouse Anti-CD8 $\alpha$                                | Cell Signaling Technology                | Cat# 70306; clone C8/144B; 1:300 for IF                                     |
| CD8 Monoclonal Antibody                                | Thermo Fisher Scientific                 | Cat# MA5-14548; clone SP16; 1:300 for IF                                    |
| APC anti-mouse CD45 Antibody                           | BioLegend                                | Cat# 103112; clone 30-F11                                                   |
| Brilliant Violet 510™ anti-mouse CD3 Antibody          | BioLegend                                | Cat# 100233; clone 17A2                                                     |
| FITC anti-mouse CD8a Antibody                          | BioLegend                                | Cat# 100706; clone 53-6.7                                                   |
| PE anti-mouse CD69 Antibody                            | BioLegend                                | Cat# 104507; clone H1.2F3                                                   |
| PerCP/Cyanine5.5 anti-human Granzyme B Recombinant     | BioLegend                                | Cat# 372212; clone QA16A02                                                  |
| Alexa Fluor® 700 anti-mouse IFN- $\gamma$ Antibody     | BioLegend                                | Cat# 505823; clone XMG1.2                                                   |
| Purified Rat Anti-Mouse CD16/CD32 (Mouse BD Fc Block™) | BD Biosciences                           | Cat# 553142; Clone 2.4G2 (RUO)                                              |
| InVivoMab anti-mouse PD-1                              | BioXcell                                 | Cat# BE0146; clone RMP1-14                                                  |
| InVivoMab rat IgG2a isotype control                    | BioXcell                                 | Cat# BE0089; clone 2A3                                                      |
| InVivoMab anti-mouse CD8 $\alpha$                      | BioXcell                                 | Cat# BE0061; clone 2.43                                                     |
| InVivoMab rat IgG2b isotype control                    | BioXcell                                 | Cat# BE0090; clone LTF-2                                                    |
| InVivoMab anti-mouse IFN $\gamma$                      | BioXcell                                 | Cat# BE0055; clone XMG1.2                                                   |
| InVivoMab rat IgG1 isotype control                     | BioXcell                                 | Cat# BE0088; clone HRPN                                                     |
| Phospho-STAT1 (Ser727) Polyclonal Antibody             | Invitrogen                               | Cat# 44-382G; 1: 500 for WB; 1:200 for IF; 1: 50 for IP                     |
| STAT1 [p Tyr701] Antibody                              | Novus Biologicals                        | Cat# AF2894-SP; 1:1000 for WB; 1: 50 for IP;                                |
| Stat1 Antibody                                         | Cell Signaling Technology                | Cat# 9172; 1:1000 for WB; 1: 50 for IP                                      |
| Rabbit Anti-GAPDH (14C10)                              | Cell Signaling Technology                | Cat# 2118; 1:2000 for WB                                                    |
| Peroxidase AffiniPure Goat Anti-Rabbit IgG (H+L)       | Jackson ImmunoResearch Laboratories, Inc | Cat# 111-035-045; 1:10000 for WB                                            |

|                                                                                         |                                          |                                  |
|-----------------------------------------------------------------------------------------|------------------------------------------|----------------------------------|
| Peroxidase AffiniPure Goat Anti-Mouse IgG (H+L)                                         | Jackson ImmunoResearch Laboratories, Inc | Cat# 115-035-003; 1:10000 for WB |
| Mouse anti-Human BATF2 / SARI Antibody                                                  | LSBio                                    | Cat# LS-C541060; 1:1000 for WB   |
| Beta-2-Microglobulin Polyclonal antibody                                                | Proteintech                              | Cat# 13511-1-AP; 1:4000 for WB   |
| PD-L1/CD274 Monoclonal antibody                                                         | Proteintech                              | Cat# 66248-1-Ig; 1:2000 for WB   |
| IFNGR1 Rabbit Polyclonal Antibody                                                       | Novus Biologicals                        | Cat# AF7176; 1:500 for WB        |
| IFNGR2 Polyclonal antibody                                                              | Proteintech                              | Cat# 10266-1-AP; 1:1000 for WB   |
| IRF1 Polyclonal antibody                                                                | Proteintech                              | Cat# 11335-1-AP; 1:500 for WB    |
| MHC class I (HLA-A/B) Rabbit mAb                                                        | ABclonal                                 | Cat# A8754; 1:1000 for WB        |
| Rabbit secondary antibody                                                               | Abcepta                                  | Cat# ASP1615; 1:10000 for WB     |
| Mouse secondary antibody                                                                | Abcepta                                  | Cat# ASP1613; 1:10000 for WB     |
| Fixable Viability Stain 450                                                             | BD Biosciences                           | Cat# 562247                      |
| Donkey anti-Mouse IgG (H+L) Highly Cross-Adsorbed Secondary Antibody, Alexa Fluor™ 488  | Invitrogen                               | Cat# A-21202; 1:5000 for IF      |
| Donkey anti-Mouse IgG (H+L) Highly Cross-Adsorbed Secondary Antibody, Alexa Fluor™ 594  | Invitrogen                               | Cat# A-21203; 1:1000 for IF      |
| Donkey anti-Rabbit IgG (H+L) Highly Cross-Adsorbed Secondary Antibody, Alexa Fluor™ 488 | Invitrogen                               | Cat# A-21206; 1:1000 for IF      |
| Donkey anti-Rabbit IgG (H+L) Highly Cross-Adsorbed Secondary Antibody, Alexa Fluor™ 594 | Invitrogen                               | Cat# A-21207; 1:3000 for IF      |
| Rabbit secondary antibody                                                               | GE Healthcare                            | Cat# NXA934; 1:10000 for WB      |
| Mouse secondary antibody                                                                | GE Healthcare                            | Cat# NXA931; 1:10000 for WB      |
| <b>Bacterial and Virus Strains</b>                                                      |                                          |                                  |
| TStbl3 Chemically Competent Cell                                                        | Tsingke Biotechnology                    | Cat# TSC-C06                     |
| TOP10 Chemically Competent Cell                                                         | Tsingke Biotechnology                    | Cat# TSC-C12                     |
| <b>Biological Samples</b>                                                               |                                          |                                  |
| Human ESCC slides                                                                       | This study                               | N/A                              |
| SCC allograft slides                                                                    | This study                               | N/A                              |

| <b>Chemicals, Peptides, and Recombinant Proteins</b>   |                          |                  |
|--------------------------------------------------------|--------------------------|------------------|
| jetPRIME® Transfection Reagent                         | Polyplus                 | Cat# 101000046   |
| Lipofectamine™ 2000 Transfection Reagent               | Thermo Fisher Scientific | Cat# 11668019    |
| Lipofectamine™ RNAiMAX Transfection Reagent            | Thermo Fisher Scientific | Cat# 13778150    |
| Polybrene                                              | Sigma-Aldrich            | Cat# H9268       |
| Puromycin                                              | Sigma-Aldrich            | Cat# 540222      |
| Doxycycline                                            | Sigma-Aldrich            | Cat# 324385      |
| Recombinant mouse Interferon gamma protein             | Abcam                    | Cat# ab9922      |
| IFN-gamma human                                        | Sigma-Aldrich            | Cat# SRP3058     |
| Fludarabine                                            | MecChemExpress           | Cat# HY-B0069    |
| IMDM                                                   | Hyclone                  | Cat# sh30228.02  |
| Ham's Nutrient Mixture F12                             | Hyclone                  | Cat# sh30026.01  |
| Fetal Bovine Serum, FBS                                | Omega Scientific         | Cat# FB-02       |
| Fetal Bovine Serum, FBS                                | Wisent                   | Cat# 086-150     |
| Insulin                                                | Sigma-Aldrich            | Cat# I6634       |
| Insulin                                                | absin                    | Cat# abs9169     |
| Hydrocortisone                                         | Sigma-Aldrich            | Cat# H0135       |
| Recombinant Human EGF                                  | Peprtech                 | Cat# AF-100-15   |
| Recombinant Murine IL-2                                | Peprtech                 | Cat# 212-12      |
| SIINFEKL (OVA <sub>257-264</sub> )                     | Sigma-Aldrich            | Cat# s7951       |
| Collagenase, Type IV                                   | Invitrogen               | Cat# 17104019    |
| DNase I                                                | Roche                    | Cat# 10104159001 |
| 0.5% Trypsin-EDTA                                      | Thermo Fisher Scientific | Cat# 15400054    |
| Isoflurane                                             | RWD                      | Cat# R510-22-10  |
| Dynabeads™ Protein G for Immunoprecipitation           | Thermo Fisher Scientific | Cat# 10004D      |
| BeyoMag™ Protein A+G                                   | Beyotime                 | Cat# P2108       |
| <b>Critical Commercial Assays</b>                      |                          |                  |
| RNeasy Mini Kit                                        | QIAGEN                   | Cat# 74106       |
| Maxima™ H Minus cDNA Synthesis Master Mix with dsDNase | Thermo Fisher Scientific | Cat# M1682       |
| PowerUp™ SYBR™ Green Master Mix                        | Thermo Fisher Scientific | Cat# A25918      |
| Steady Pure Universal RNA Extraction Kit               | Accurate Biology         | Cat# AG21017     |
| Evo M-MLV RT Premix                                    | Accurate Biology         | Cat# AG11707     |
| SYBR® Green Premix Pro Taq HS qPCR Kit                 | Accurate Biology         | Cat# AG11701     |
| Pro Taq HS PCR                                         | Accurate Biology         | Cat# AG11307     |
| ZymoPURE II Plasmid Kits                               | Zymo Research            | Cat# D4200       |
| TIANpure Mini Plasmid Kit                              | TIANGEN                  | Cat# DP104-02    |
| Pierce™ Rapid Gold BCA Protein Assay Kit               | Thermo Fisher Scientific | Cat# A53225      |

|                                                   |                                                                            |                                            |
|---------------------------------------------------|----------------------------------------------------------------------------|--------------------------------------------|
| MojoSort™ Mouse CD8 T Cell Isolation Kit          | Biolegend                                                                  | Cat# 480007                                |
| RBC Lysis Buffer                                  | Biolegend                                                                  | Cat# 420301                                |
| Tumor Dissociation Kit, mouse                     | Miltenyi Biotec                                                            | Cat# 130-096-730                           |
| CD45 (TIL) MicroBeads, mouse                      | Miltenyi Biotec                                                            | Cat# 130-110-618                           |
| True-Nuclear™ Transcription Factor Buffer Set     | BioLegend                                                                  | Cat# 424401                                |
| Dual-Luciferase® Reporter Assay System            | Promega                                                                    | Cat# E1960                                 |
| Dual-Luciferase® Reporter Assay System            | YEASEN                                                                     | Cat# 11402ES60                             |
| <b>Experimental Models: Cell Lines</b>            |                                                                            |                                            |
| TE5<br>TT                                         | Dr. Koji Kono<br>(Cancer Science Institute of Singapore, Singapore)        | N/A                                        |
| AKR<br>HNM007                                     | Dr Anil K. Rustgi<br>(Columbia University Irving Medical Center, USA)      | N/A                                        |
| MOC1<br>MOC22                                     | The laboratory of Ravindra Uppaluri<br>(Dana-Farber Cancer Institute, USA) | N/A                                        |
| <b>Experimental Models: Organisms/Strains</b>     |                                                                            |                                            |
| C57BL/6J                                          | The Jackson Laboratory                                                     | Strain# 000664<br>RRID:IMSR_JAX:000664     |
| C57BL/6-Tg (Tcrb)1100Mjb/J                        | The Jackson Laboratory                                                     | Strain# 003831<br>RRID:IMSR_JAX:003831     |
| C57BL/6JGpt                                       | Gem Pharmatech                                                             | Cat# N000013                               |
| C57BL/6-Tg (Tcrb)1100Mjb/J                        | Dr. Zhengfan Jiang<br>Peking University, China                             | N/A                                        |
| <b>Oligonucleotides</b>                           |                                                                            |                                            |
| qRT-PCR primers, see Table S2                     | Integrated DNA Technologies; Tsingke Biotechnology                         | N/A                                        |
| shRNA sequences, see Table S2                     | Integrated DNA Technologies; Tsingke Biotechnology                         | N/A                                        |
| <b>Recombinant DNA</b>                            |                                                                            |                                            |
| pLKO.1-TRC                                        | pLKO.1 - TRC cloning vector was a gift from David Root                     | Addgene plasmid #10878; RRID:Addgene_10878 |
| pLKO.1-Scramble, pLKO.1-shTP63-1, pLKO.1-shTP63-2 | Jiang et al.                                                               | N/A                                        |
| Tet-pLKO-puro                                     | Tet-pLKO-puro was a gift from Dmitri Wiederschain                          | Addgene plasmid #21915; RRID:Addgene_21915 |
| Tet-pLKO-Scramble                                 | This study                                                                 | N/A                                        |

|                                        |                                                     |                                                                                                                                                                                                                                   |
|----------------------------------------|-----------------------------------------------------|-----------------------------------------------------------------------------------------------------------------------------------------------------------------------------------------------------------------------------------|
| Tet-pLKO-sh <i>Trp63-1</i>             | This study                                          | N/A                                                                                                                                                                                                                               |
| Tet-pLKO-sh <i>Trp63-2</i>             | This study                                          | N/A                                                                                                                                                                                                                               |
| psPAX2                                 | psPAX2 was a gift from Didier Trono                 | Addgene plasmid # 12260; RRID:Addgene_12260                                                                                                                                                                                       |
| pMD2.G                                 | pMD2.G was a gift from Didier Trono                 | Addgene plasmid # 12259; RRID:Addgene_12259                                                                                                                                                                                       |
| deltaNp63alpha-FLAG                    | deltaNp63alpha-FLAG was a gift from David Sidransky | Addgene plasmid # 26979; RRID: Addgene_26979                                                                                                                                                                                      |
| pCDH-CMV-MCS-EF1-CopGFP-T2A-Puro       | MIAOLING BIOLOGY                                    | Cat# P29673                                                                                                                                                                                                                       |
| pCDH-CMV-STAT1(mouse)-3×FLAG-EF1a-Puro | MIAOLING BIOLOGY                                    | Cat# P0268                                                                                                                                                                                                                        |
| <b>Software and Algorithms</b>         |                                                     |                                                                                                                                                                                                                                   |
| GraphPad Prism 8.0                     | GraphPad Software                                   | <a href="http://www.graphpad.com/">http://www.graphpad.com/</a>                                                                                                                                                                   |
| Cell Ranger v7.0.0                     | Zheng et al. <sup>3</sup>                           | <a href="https://support.10xgenomics.com/single-cell-gene-expression/software/pipelines/latest/what-is-cell-ranger">https://support.10xgenomics.com/single-cell-gene-expression/software/pipelines/latest/what-is-cell-ranger</a> |
| Seurat v.4.1.0                         | Stuart et al. <sup>4</sup>                          | <a href="https://github.com/satijalab/seurat">https://github.com/satijalab/seurat</a>                                                                                                                                             |
| SAMtools v1.7                          | Li et al. <sup>5</sup>                              | <a href="https://github.com/samtools/samtools">https://github.com/samtools/samtools</a>                                                                                                                                           |
| MarkDuplicates v.1.136                 | N/A                                                 | <a href="https://broadinstitute.github.io/picard/">https://broadinstitute.github.io/picard/</a>                                                                                                                                   |
| MACS2 v2.2.6                           | Liu et al. <sup>6</sup>                             | <a href="http://github.com/taoliu/MACS">http://github.com/taoliu/MACS</a>                                                                                                                                                         |
| HOMER                                  | Heinz et al. <sup>7</sup>                           | <a href="http://homer.ucsd.edu/homer/index.html">http://homer.ucsd.edu/homer/index.html</a>                                                                                                                                       |
| FlowJo v.10.8                          | FlowJo, LLC                                         | RRID: SCR_008520                                                                                                                                                                                                                  |
| <b>Deposited Data</b>                  |                                                     |                                                                                                                                                                                                                                   |
| scRNA-seq MOC22 tumors                 | This study                                          | GSE221938<br>[ <a href="https://www.ncbi.nlm.nih.gov/geo/query/acc.cgi?acc=GSE221938">https://www.ncbi.nlm.nih.gov/geo/query/acc.cgi?acc=GSE221938</a> ]                                                                          |
| scRNA-seq data of human ESCC           | Zhang et al. <sup>1</sup>                           | GSE160269<br>[ <a href="https://www.ncbi.nlm.nih.gov/geo/query/acc.cgi?acc=GSE160269">https://www.ncbi.nlm.nih.gov/geo/query/acc.cgi?acc=GSE160269</a> ]                                                                          |
| RNA Expression Data                    | TCGA                                                | <a href="http://www.cbioportal.org">www.cbioportal.org</a>                                                                                                                                                                        |
| RNA Expression Data                    | CCLC                                                | <a href="https://portals.broadinstitute.org/ccle">https://portals.broadinstitute.org/ccle</a>                                                                                                                                     |
| RNA-seq data of TE5                    | Jiang et al. <sup>8</sup>                           | GSE106564<br>[ <a href="https://www.ncbi.nlm.nih.gov/geo/query/acc.cgi?acc=GSE106564">https://www.ncbi.nlm.nih.gov/geo/query/acc.cgi?acc=GSE106564</a> ]                                                                          |
| RNA-seq data of FaDu                   | Saladi et al. <sup>9</sup>                          | GSE88833<br>[ <a href="https://www.ncbi.nlm.nih.gov/geo/query/acc.cgi?acc=GSE88833">https://www.ncbi.nlm.nih.gov/geo/query/acc.cgi?acc=GSE88833</a> ]                                                                             |

|                                                          |                                                                                                  |                                                                                                                                                                                                                                            |
|----------------------------------------------------------|--------------------------------------------------------------------------------------------------|--------------------------------------------------------------------------------------------------------------------------------------------------------------------------------------------------------------------------------------------|
|                                                          |                                                                                                  | v/geo/query/acc.cgi?acc=GS E88833]                                                                                                                                                                                                         |
| RNA-seq data of SCC-6                                    | Barbieri et al. <sup>10</sup>                                                                    | GSE4975<br>[https://www.ncbi.nlm.nih.gov/geo/query/acc.cgi?acc=GS E4975]                                                                                                                                                                   |
| STAT1 ChIP-seq                                           | Ao et al.                                                                                        | GSE78212<br>[https://www.ncbi.nlm.nih.gov/geo/query/acc.cgi?acc=GS E78212]                                                                                                                                                                 |
| TP63 ChIP-seq<br>H3K27ac ChIP-seq                        | Watanabe et al. <sup>11</sup><br><br>Jiang et al. <sup>8</sup><br><br>Jiang et al. <sup>12</sup> | GSE46837<br>[https://www.ncbi.nlm.nih.gov/geo/query/acc.cgi?acc=GS E46837]<br>GSE106563<br>[https://www.ncbi.nlm.nih.gov/geo/query/acc.cgi?acc=GS E106563]<br>GSE148920<br>[https://www.ncbi.nlm.nih.gov/geo/query/acc.cgi?acc=GS E148920] |
| <b>Other</b>                                             |                                                                                                  |                                                                                                                                                                                                                                            |
| RIPA Lysis Buffer                                        | Merck Millipore                                                                                  | Cat# 20-188                                                                                                                                                                                                                                |
| RIPA buffer                                              | Solarbio                                                                                         | Cat# R0020                                                                                                                                                                                                                                 |
| cOmplete™, EDTA-free Protease Inhibitor Cocktail Tablets | Roche                                                                                            | Cat# 4693132001                                                                                                                                                                                                                            |
| Phosphatase Inhibitor Cocktail Tablets                   | Roche                                                                                            | Cat# 04906837001                                                                                                                                                                                                                           |
| PageRuler™ Prestained Protein Ladder                     | Thermo Fisher Scientific                                                                         | Cat# 26616                                                                                                                                                                                                                                 |
| ColorMixed Protein Marker                                | Solarbio                                                                                         | Cat# PR1920                                                                                                                                                                                                                                |
| Immobilon-P PVDF Membrane                                | Merck Millipore                                                                                  | Cat# IPVH00010                                                                                                                                                                                                                             |
| Amersham ECL Western Blotting Detection Reagent          | GE Healthcare Life Sciences                                                                      | Cat# RPN2106                                                                                                                                                                                                                               |
| Mounting medium with DAPI                                | ZSGB-BIO                                                                                         | Cat# ZLI-9557                                                                                                                                                                                                                              |
| ECL Chemiluminescence Kit                                | Vazyme                                                                                           | Cat# E412-02                                                                                                                                                                                                                               |

WB: Western Blotting; IF: Immunofluorescence; IP: Immunoprecipitation.

**Supplementary Table 2. Oligonucleotides used for siRNA, shRNA, quantitative real-time PCR and DNA fragment amplification.**

|           | <b>Forward</b>                | <b>Reverse</b>                  |
|-----------|-------------------------------|---------------------------------|
| siTrp63-1 | GAGCAUGUCACCGAGGUUGUGAA<br>AC | GUUUCACAACCUCGGUGACAUGC<br>UCAG |
| siTrp63-2 | GGCACUGAAUUCACAACAGUCCUG<br>T | ACAGGACUGUUGUGAAUUCAGU<br>GCCAA |



|                  |                                                                            |                                                                            |
|------------------|----------------------------------------------------------------------------|----------------------------------------------------------------------------|
| <i>siTrp63-3</i> | CAAGAAAGCUGAGCAUGUCACCGA<br>G                                              | CUCGGUGACAUGCUCAGCUUUCU<br>UGUA                                            |
| <i>siTrp63-4</i> | GUCAUCUGAUUCGAGUAGAAGGG<br>AA                                              | UCCCUUCUACUCGAAUCAGAUG<br>ACUG                                             |
| <i>shTrp63-1</i> | CCGGGGCACTGAATTCACAACAGT<br>CCTGTCTCGAGACAGGACTGTTGTG<br>AATTCAGTGCCTTTTTG | AATTCAAAAAGGCACTGAATTCA<br>CAACAGTCCTGTCTCGAGACAGG<br>ACTGTTGTGAATTCAGTGCC |
| <i>shTrp63-2</i> | CCGGGTCATCTGATTCGAGTAGAA<br>GGGAACTCGAGTTCCTTCTACTCG<br>AATCAGATGACTTTTTG  | AATTCAAAAAGTCATCTGATTCGA<br>GTAGAAGGGAAGTTCGAGTTCCTT<br>CTACTCGAATCAGATGAC |
| <i>B2M</i>       | CGTACTCTCTCTTTCTGGC                                                        | CAGACACATAGCAATTCAGG                                                       |
| <i>CD74</i>      | CCAGCGCGACCTTATCTCC                                                        | TCACCAGGATGGAAAAGCCTG                                                      |
| <i>PSMB9</i>     | TCCATGGGATAGAAGTGGAGGA                                                     | ATGGCAAAGGCTGTCGAGT                                                        |
| <i>LAP3</i>      | CAATGCCGCCACCTTAACAG                                                       | TGCTGGCCTCGAAGAGTTTG                                                       |
| <i>IRF1</i>      | ATGCTTCCACCTCTCACCAA                                                       | CATGTAGCCTGGAAGTGTGT                                                       |
| <i>IRF7</i>      | GAGCTGTGCTGGCGAGAAG                                                        | GGAGTCCAGCATGTGTGTGT                                                       |
| <i>SP110</i>     | CCTGCGTGAATATCCCAATC                                                       | CAGGGTGAACAGCTTGGTTG                                                       |
| <i>BATF2</i>     | CACCCTCAGACCCCTCCTAA                                                       | GAACTTCCACCCGGTCATGG                                                       |
| <i>ISG15</i>     | AGGCAGCGAACTCATCTTTG                                                       | AGCTCTGACACCGACATGGA                                                       |
| <i>ISG20</i>     | GGCTACACAATCTACGACAC                                                       | CTCGGATTCTCTGGGAGATT                                                       |
| <i>OASL</i>      | ATTGTGCCTGCCTACAGAGC                                                       | ATGTCTCGTGCCCTCTGCT                                                        |
| <i>BST2</i>      | AGGAGCTTGAGGGAGAGATCA                                                      | ACTTCTTGTCGCGATTCTCA                                                       |
| <i>CXCL10</i>    | CCTGCAAGCCAATTTTGTCCA                                                      | TGATGGCCTTCGATTCTGGAT                                                      |
| <i>CXCL11</i>    | CAAATCGAAGCAAGCAAGGC                                                       | TCAGATGCTCTTTTCCAGGACTT                                                    |
| <i>IL15</i>      | TTTCAGTGCAGGGCTTCCCTAA                                                     | GGGTGAACATCACTTTCCGTAT                                                     |
| <i>LY6E</i>      | TTGGTTTGTGACCTCCAGGC                                                       | TCACGAGATTCCCAATGCCG                                                       |
| <i>RIPK2</i>     | AAACTTCAAGGTCCCTGCCA                                                       | GATCACAGAATGCAGCCCTT                                                       |
| <i>IFI44</i>     | CGATGCGAAGATTCACTGGA                                                       | TCGTATTTGTTGAACCAGGG                                                       |
| <i>IFI44L</i>    | CCATCTCTGAAGGACAGGAT                                                       | CGGCTTTGAGAAGTCATAGA                                                       |
| <i>IFITM3</i>    | TACTCCGTGAAGTCTAGGGA                                                       | CAGTGATGCCTCCTGATCTA                                                       |
| <i>IFITM2</i>    | GCCCTGATTTTGGGCATCTTCA                                                     | GATGCCTCCTGATCTATCGCT                                                      |
| <i>EPSTI1</i>    | ACCCGCAATAGAGTGGTGAA                                                       | TGTATGCACTTGTGCGCCT                                                        |
| <i>GBP4</i>      | CGGCTGGACTTTCAGCTTCTA                                                      | TCTGGATAACCTGGTGTGGG                                                       |
| <i>STAT1</i>     | ACAGCAGAGCGCCTGTATTG                                                       | CTGCAGACTCTCCGCAACTA                                                       |
| <i>GAPDH</i>     | GAAGGTGAAGGTTCGGAGTC                                                       | GAAGATGGTGTGATGGGATTTT                                                     |
| <i>B2m</i>       | TACGCCTGCAGAGTTAAGCA                                                       | GATCACATGTCTCGATCCCAGT                                                     |
| <i>Cd74</i>      | CCTTGCTGATGCGTCCAATG                                                       | CTGGGTCATGTTGCCGTA                                                         |
| <i>Psmb9</i>     | GGGACAACCATCATGGCAGT                                                       | CAGCAGCGGAACCTGAGAG                                                        |
| <i>Lap3</i>      | TGACGAAGGGCCTTGTTTTAG                                                      | AGAGGAGGTCCAGATATGTTCAA                                                    |
| <i>Irf1</i>      | CAGCCGAGACACTAAGAGCAA                                                      | GCTGCTGAGTCCATCAGAGA                                                       |
| <i>Irf7</i>      | GCGTACCCTGGAAGCATTTC                                                       | GCACAGCGGAAGTTGGTCT                                                        |
| <i>Sp110</i>     | ATGAAGGTGAACATCGCCTATG                                                     | GGACAGAGGGACCAGATTTTG                                                      |
| <i>Batf2</i>     | AGAAGCAGAAGAACCGAGTGG                                                      | AAGGATTCGTGCTGCTGGTG                                                       |
| <i>Isg15</i>     | GGTGTCCGTGACTAACTCCAT                                                      | TGGAAAGGGTAAGACCGTCT                                                       |
| <i>Isg20</i>     | GACCCGAGGGAGAGATCAC                                                        | CAGGGCATTGAAGTCGTGCT                                                       |
| <i>Oasl1</i>     | TGCTCAAGGTACTCAAGGTAGG                                                     | TGGTACTCTGTTAGTCACACTC                                                     |
| <i>Bst2</i>      | TGTAGAGACGGGTTGCGAG                                                        | CAGGGACTCCTGAAGGGTC                                                        |
| <i>Cxcl10</i>    | CCAAGTGTGCGTCATTTTC                                                        | GGCTCGCAGGGATGATTTCAA                                                      |
| <i>Cxcl11</i>    | TGTAATTTACCCGAGTAACGGC                                                     | CACCTTTGTCGTTTATGAGCCTT                                                    |

|                       |                                           |                                           |
|-----------------------|-------------------------------------------|-------------------------------------------|
| <i>Il15</i>           | CATCCATCTCGTGCTACTTGTG                    | GCCTCTGTTTTAGGGAGACCT                     |
| <i>LY6E</i>           | GGGCATGGAGCAAGTTCATTC                     | GGCCACAGGCAGTTTATATTGTT                   |
| <i>Ripk2</i>          | ATGCCACCTGAGAACTATGAGC                    | GCAAAGGATTGGTGACCTCTT                     |
| <i>Ifi44</i>          | AACTGACTGCTCGCAATAATGT                    | GTAACACAGCAATGCCTCTTGT                    |
| <i>Ifi44l</i>         | TCAGTTCAACCCCTGTGAGC                      | TGGACATTCTGAACCTGGCTT                     |
| <i>Ifitm3</i>         | CCCCAAACTACGAAAGAATCA                     | ACCATCTTCCGATCCCTAGAC                     |
| <i>Ifitm2</i>         | TGGGCTTCGTTGCCATATGC                      | AGAATGGGGTGTTCTTTGTGC                     |
| <i>Epsti1</i>         | TTGCAGCAAACCCGGAGACA                      | TCTCGTTTGGTGCTATCAGGG                     |
| <i>Gbp4</i>           | GGAGAAGCTAACGAAGGAACAA                    | TTCCACAAGGGAATCACCATTTT                   |
| <i>Stat1</i>          | TTCCCTCCTGGGCCTGATTA                      | AGATCCCGTACAGATGTCCA                      |
| <i>Gapdh</i>          | CATCACTGCCACCCAGAAGACTG                   | ATGCCAGTGAGCTTCCCGTTCAG                   |
| <i>STAT1-Promoter</i> | TTCTCTATCGATAGGTAGCAGGAAA<br>GCGAAACTACCC | GATCGCAGATCTCGAGGCCGCGT<br>CTAATTGGCTGAG  |
| <i>STAT1-Enhancer</i> | TTCTCTATCGATAGGTAAGCACTAT<br>CACATTCGCGGT | GATCGCAGATCTCGAGGTTCCGA<br>AGCGGTTCAAACCT |

## Supplementary References

- Zhang, X. *et al.* Dissecting esophageal squamous-cell carcinoma ecosystem by single-cell transcriptomic analysis. *Nat Commun* **12**, 5291, doi:10.1038/s41467-021-25539-x (2021).
- Li, T. *et al.* TIMER: A Web Server for Comprehensive Analysis of Tumor-Infiltrating Immune Cells. *Cancer Res* **77**, e108-e110, doi:10.1158/0008-5472.CAN-17-0307 (2017).
- Zheng, G. X. *et al.* Massively parallel digital transcriptional profiling of single cells. *Nat Commun* **8**, 14049, doi:10.1038/ncomms14049 (2017).
- Stuart, T. *et al.* Comprehensive Integration of Single-Cell Data. *Cell* **177**, 1888-1902 e1821, doi:10.1016/j.cell.2019.05.031 (2019).
- Li, H. *et al.* The Sequence Alignment/Map format and SAMtools. *Bioinformatics* **25**, 2078-2079, doi:10.1093/bioinformatics/btp352 (2009).
- Liu, T. Use model-based Analysis of ChIP-Seq (MACS) to analyze short reads generated by sequencing protein-DNA interactions in embryonic stem cells. *Methods Mol Biol* **1150**, 81-95, doi:10.1007/978-1-4939-0512-6\_4 (2014).
- Heinz, S. *et al.* Simple combinations of lineage-determining transcription factors prime cis-regulatory elements required for macrophage and B cell identities. *Mol Cell* **38**, 576-589, doi:10.1016/j.molcel.2010.05.004 (2010).
- Jiang, Y. *et al.* Co-activation of super-enhancer-driven CCAT1 by TP63 and SOX2 promotes squamous cancer progression. *Nat Commun* **9**, 3619, doi:10.1038/s41467-018-06081-9 (2018).
- Saladi, S. V. *et al.* ACTL6A Is Co-Amplified with p63 in Squamous Cell Carcinoma to Drive YAP Activation, Regenerative Proliferation, and Poor Prognosis. *Cancer Cell* **31**, 35-49, doi:10.1016/j.ccell.2016.12.001 (2017).
- Barbieri, C. E., Tang, L. J., Brown, K. A. & Pietenpol, J. A. Loss of p63 leads to increased cell migration and up-regulation of genes involved in invasion and metastasis. *Cancer Res* **66**, 7589-7597, doi:10.1158/0008-5472.CAN-06-2020 (2006).
- Watanabe, H. *et al.* SOX2 and p63 colocalize at genetic loci in squamous cell carcinomas. *J Clin Invest* **124**, 1636-1645, doi:10.1172/JCI71545 (2014).
- Jiang, Y. Y. *et al.* TP63, SOX2, and KLF5 Establish a Core Regulatory Circuitry That Controls Epigenetic and Transcription Patterns in Esophageal Squamous Cell Carcinoma Cell Lines. *Gastroenterology* **159**, 1311-1327 e1319, doi:10.1053/j.gastro.2020.06.050 (2020).
